1  
2  
3  
4  
5  
6  
7  
8  
9  
10  
11  
12  
13  
14  
15  
16  
17  
18  
19  
20  
21  
22

## **A single N6-methyladenosine site in lncRNA HOTAIR regulates its function in breast cancer cells**

Authors: Allison M. Porman<sup>1</sup>, Justin T. Roberts<sup>1,2</sup>, Emily D. Duncan<sup>2,3</sup>, Madeline Chrupcala<sup>1,4</sup>, Ariel Levine<sup>1,4</sup>, Michelle Kennedy<sup>1</sup>, Michelle M. Williams<sup>5</sup>, Jennifer K. Richer<sup>5</sup>, Aaron M. Johnson<sup>1,2,4,\*</sup>

Affiliations: <sup>1</sup>University of Colorado Anschutz Medical Campus, Biochemistry and Molecular Genetics Department; <sup>2</sup>University of Colorado Anschutz Medical Campus, Molecular Biology Graduate Program, <sup>4</sup>University of Colorado Anschutz Medical Campus, Cell and Developmental Biology; <sup>4</sup>University of Colorado Anschutz Medical Campus, RNA Bioscience Initiative <sup>5</sup>Department of Pathology, University of Colorado Anschutz Medical Campus Aurora, Colorado.

\*Corresponding Author

Aaron M. Johnson, PhD

e-mail: [Aaron.m.johnson@CUAnschutz.edu](mailto:Aaron.m.johnson@CUAnschutz.edu)

Tel: +1(303)724-3224

23 **Abstract**

24 N6-methyladenosine (m6A) modification of RNA plays important roles in normal and cancer  
25 biology, but knowledge of its function on long noncoding RNAs (lncRNAs) remains limited. Here, we  
26 investigate whether m6A regulates the function of the human HOTAIR lncRNA, which contributes to  
27 multiple pro-tumor phenotypes in triple-negative breast cancer (TNBC) cells. We identify at least 8  
28 individual m6A sites within HOTAIR, with a single site (A783) consistently methylated. Mutation of A783  
29 impairs cellular proliferation and invasion in HOTAIR-overexpressing TNBC cells. m6A at A783 regulates  
30 HOTAIR's ability to localize to chromatin and induce gene pathways that affect tumor progression. In  
31 contrast, A783U mutant HOTAIR demonstrates loss-of-function and antimorph behaviors by impairing  
32 gene expression changes induced by WT HOTAIR and, in some cases, inducing opposite changes in  
33 gene expression. HOTAIR interacts with nuclear m6A reader YTHDC1 and high HOTAIR is significantly  
34 associated with shorter overall patient survival, particularly in the context of high *YTHDC1*. At the  
35 molecular level, YTHDC1-HOTAIR interactions are required for chromatin localization and regulation of  
36 gene repression. Our work demonstrates how modification of one base in a lncRNA can elicit a distinct  
37 gene regulation mechanism and drive disease-associated phenotypic changes such as proliferation and  
38 invasion.

39

## 40 **Introduction**

41 Long non-coding RNAs (lncRNAs) are becoming increasingly noted for their roles in  
42 transcriptional regulation (Long, Wang, Youmans, & Cech, 2017). Members of this class of noncoding  
43 RNAs are typically longer than 200 nucleotides, transcribed by RNA polymerase II, and processed  
44 similarly to mRNAs (Esteller, 2011). LncRNAs regulate transcription in a variety of ways; they can alter  
45 chromatin by directing histone-modifying enzymes to their target loci to induce changes in chromatin, or  
46 can regulate transcription directly by interacting with transcription factors and RNA polymerase II (Long  
47 et al., 2017). Importantly, lncRNAs are often key regulators of epigenetic changes that can drive cancer  
48 progression, often by aberrant overexpression (Schmitt & Chang, 2016).

49 The human lncRNA HOTAIR is a 2.2kb spliced and polyadenylated RNA transcribed from the  
50 HoxC locus. Originally identified as a developmental regulator acting in *trans* to repress expression of  
51 the HoxD locus (Rinn et al., 2007), aberrant high levels of HOTAIR are associated with poor survival and  
52 increased cancer metastasis in many different cancer types, including breast cancer (Balas & Johnson,  
53 2018; Gupta et al., 2010). Exogenous overexpression of HOTAIR in the MDA-MB-231 TNBC cell line  
54 results in the repression of hundreds of genes (Gupta et al., 2010), and it promotes cell invasion,  
55 migration, proliferation, and self-renewal capacity in multiple breast cancer cell lines (Deng et al., 2017;  
56 Gupta et al., 2010; Meredith, Balas, Sindy, Haislop, & Johnson, 2016). HOTAIR function is particularly  
57 striking in MDA-MB-231 cells, given that this is already a highly invasive breast cancer cell line and its  
58 invasiveness is increased even further by HOTAIR overexpression (Gupta et al., 2010; Meredith et al.,  
59 2016). This is reflective of the prognostic impact of HOTAIR expression in TNBC patients where high  
60 HOTAIR expression correlates with poorer overall survival (Gupta et al., 2010; Yang et al., 2011). MDA-  
61 MB-231 cells express low levels of endogenous HOTAIR, offering an opportunity to study response to  
62 HOTAIR transgenic overexpression, which is proposed to mimic the high levels of HOTAIR observed in  
63 patients with aggressive TNBC (Gupta et al., 2010).

64 At its target loci, HOTAIR mediates the induction of H3K27 trimethylation (H3K27me3) by  
65 Polycomb Repressive Complex 2 (PRC2), resulting in heterochromatin formation and repression (Gupta

66 et al., 2010; Tsai et al., 2010; Yansheng Wu et al., 2015). In cancer contexts, high levels of HOTAIR  
67 misdirect this mechanism to loci that are not typically repressed in the tissue of origin (Balas & Johnson,  
68 2018; Gupta et al., 2010; Hajjari & Salavaty, 2015). Despite these previous findings, a recent study  
69 demonstrated that HOTAIR can repress genes even in the absence of PRC2, suggesting that initial  
70 repression or transcriptional interference may occur upstream of H3K27me3 by PRC2 (Portoso et al.,  
71 2017) (Figure 1A).

72 HOTAIR also interacts with lysine-specific demethylase 1 (LSD1), a histone demethylase that  
73 acts on H3K4me2, which has been proposed to reinforce repression by HOTAIR (L. Li et al., 2013;  
74 Somarowthu et al., 2015; Tsai et al., 2010). A new study in human epithelial kidney cells found that  
75 HOTAIR utilizes its LSD1-interacting domain to perturb LSD1 genomic distribution, independent of major  
76 changes in H3K4me2, leading to increased invasion (Jarroux et al., 2021). In this context, HOTAIR is  
77 proposed to inhibit the normal function of LSD1 in maintaining epithelial cells (Jarroux et al., 2021;  
78 McDonald, Wu, Timp, Doi, & Feinberg, 2011; Wang et al., 2009). In light of these findings, how HOTAIR  
79 specifically accomplishes transcriptional repression at its target loci, and how other pathways and cancer  
80 contexts influence HOTAIR function, remain elusive.

81 N6-methyladenosine (m6A) is a reversible RNA modification. It has been well studied in  
82 messenger RNAs (mRNAs), where it can regulate multiple steps of the mRNA life cycle, including  
83 processing, decay, and translation (Shi, Wei, & He, 2019); however, how m6A regulates lncRNA-  
84 mediated processes is less understood. Nevertheless, there is evidence for m6A regulation of lncRNAs.  
85 For example, the lncRNA Xist, a key mediator of X chromosome inactivation, contains multiple m6A sites  
86 that contribute to its ability to induce repression of the X chromosome (Coker et al., 2020; Patil et al.,  
87 2016).

88 The m6A modification on an RNA is typically recognized by a “reader” protein that binds  
89 specifically to methylated adenosine to mediate the functional outcome of m6A deposition. Apart from  
90 the YTH family of proteins which contain the YTH domain that directly read m6A, a handful of non-  
91 canonical indirect m6A readers have been suggested (Zaccara, Ries, & Jaffrey, 2019). In the case of Xist,

92 the canonical YTH-containing nuclear localized m6A reader YTHDC1 recognizes m6A on Xist to mediate  
93 repression of the X chromosome(Nesterova et al., 2019; Patil et al., 2016). In contrast, m6A on *cis*-acting  
94 chromatin-associated regulatory RNAs leads to their YTHDC1-dependent degradation, preventing  
95 transcription of downstream genes(Jun Liu et al., 2020). Collectively, m6A influences the regulatory roles  
96 of both mRNA and noncoding RNA via diverse mechanisms(Coker, Wei, & Brockdorff, 2019).

97 RNA modifications such as m6A have been shown to play critical roles in several human  
98 cancers(X. Wu, Sang, & Gong, 2018). In breast cancer, studies have revealed that dysregulation of m6A  
99 levels can generate breast cancer stem-like cells and promote metastasis(Niu et al., 2019; C. Zhang et  
100 al., 2016; J. X. Zhang et al., 2013). Of the currently designated m6A reader proteins, we have previously  
101 shown that hnRNP A2/B1, a proposed non-canonical reader lacking the m6A-binding YTH domain, can  
102 interact with HOTAIR to regulate its chromatin and cancer biology mechanisms by promoting HOTAIR  
103 interactions with target mRNAs(Meredith et al., 2016). This evidence suggests that m6A may play a role  
104 in cancers where HOTAIR is overexpressed.

105 Here, we set out to investigate the potential function of m6A in HOTAIR-mediated breast cancer  
106 growth and invasion. We identify at least 8 m6A sites in HOTAIR and show that a single site (A783) is  
107 required for HOTAIR-mediated TNBC growth and invasion. Mutation of adenosine 783 in HOTAIR to  
108 uracil prevents the normal chromatin association and gene expression changes that are induced by the  
109 wild-type lncRNA. Surprisingly, the A783U mutant induces opposite gene expression changes to wild-  
110 type HOTAIR, reducing cancer phenotypes in TNBC cells, suggesting that the mutant HOTAIR is an  
111 antimorph. We find that YTHDC1, the nuclear m6A reader, interacts with HOTAIR at methylated A783  
112 and artificial tethering of YTHDC1 at this site is sufficient to restore HOTAIR chromatin association in the  
113 A783 mutant. Finally, using a reporter system, we show that YTHDC1 mediates repression by HOTAIR  
114 in the absence of PRC2. Overall, our results suggest a model where a single site of m6A modification on  
115 HOTAIR enables a strong interaction with YTHDC1 to retain HOTAIR on chromatin for repression of its  
116 target genes, leading to altered TNBC properties. Collectively, our results demonstrate the potent activity  
117 of m6A on lncRNAs and in turn their role in cancer.

118

## 119 **Results**

### 120 **HOTAIR contains multiple sites of m6A modification in breast cancer cell lines**

121 To investigate the possibility that m6A regulates the function of HOTAIR in a mechanism similar  
122 to its regulation of lncRNA Xist, we examined previous genome-wide maps of m6A sites in human cells.  
123 Using the CVM6A database(Han et al., 2019), we found 3 m6A peaks in HOTAIR in HeLa cells, although  
124 the enrichment score for these sites was low(Figure 1 – figure supplement 1). To evaluate m6A  
125 methylation of HOTAIR in relevant breast cancer cells, we performed m6A RNA immunoprecipitation  
126 (meRIP) qRT-PCR in MCF-7 cells, which express low levels of endogenous HOTAIR(Meredith et al.,  
127 2016). A significant portion of HOTAIR was recovered upon immunoprecipitation with the anti-m6A  
128 antibody (26.2%,  $p=0.006$ ), similar to an m6A modified region on the positive control region of *EEF1A1*,  
129 and consistently higher than a distal region of *EEF1A1* that is not m6A modified (Figure 1B).

130 We further found that m6A modification of HOTAIR is maintained during ectopic expression of  
131 HOTAIR in a stable MDA-MB-231 cell line. meRIP in MDA-MB-231 cells expressing transgenic HOTAIR  
132 resulted in significant HOTAIR recovery (27.1%,  $p=0.0009$ ) (Figure 1C). These results demonstrate that  
133 HOTAIR is m6A modified in two distinct breast cancer contexts.

134 To identify single nucleotide sites of m6A modification, we performed a modified m6A eCLIP  
135 protocol(Roberts, Porman, & Johnson, 2020) on polyA-selected RNA from MCF-7 and MDA-MB-231  
136 breast cancer cells (Figure 1 – figure supplement 2). In MCF-7 cells, we identified one m6A site within  
137 the HOTAIR transcript at adenosine 783 (Figure 1D, Table S1). m6A at adenosine 783 in MDA-MB-231  
138 cells with transgenic HOTAIR was consistently detected with high confidence (Table S1), along with 7  
139 other sites using our multi-replicate consensus approach (Roberts et al., 2020) (Table S2). Of note, A783  
140 occurred within a non-canonical 'GAACG' sequence located in an unstructured region of the HOTAIR  
141 secondary structure(Somarowthu et al., 2015) (Figure 1 – figure supplement 3A).

142 To test if HOTAIR is m6A modified by the canonical m6A methyltransferase METTL3/14 complex,  
143 we performed shRNA mediated depletion of METTL3, METTL14, and the adaptor protein WTAP in MCF-  
144 7 cells (Figure 1 – figure supplement 4B). We observed a ~3 to 5-fold reduced recovery of HOTAIR in  
145 methyltransferase-depleted cells relative to non-targeting controls ( $p=0.0063$ ) (Figure 1 – figure  
146 supplement 4C). Together, these results indicate that m6A methylation of HOTAIR is dependent on the  
147 METTL3/14 complex.

148

### 149 **Nucleotide A783 is important for the ability of HOTAIR to promote breast cancer cell proliferation** 150 **and invasion**

151 Given that nucleotide A783 was consistently methylated within HOTAIR in our m6A mapping  
152 experiments, in both endogenous and overexpressed contexts, we asked whether this modification had  
153 any consequences to HOTAIR function. To directly test the functional role of A783, we mutated the  
154 adenosine to uracil at this position (HOTAIR<sup>A783U</sup>). We then mapped m6A sites in MDA-MB-231 cells  
155 overexpressing the HOTAIR<sup>A783U</sup> mutant as above (Table S1). Both wild-type (WT) and the mutant form  
156 of HOTAIR were expressed at similar levels, with approximately 5,000 transcripts per cell (Figure 1E),  
157 resembling the high levels of HOTAIR observed in samples from cancer patients (Arshi A, Raeisi F,  
158 Mahmoudi E, Mohajerani F, Kabiri H, Fazel R, Zabihian-Langeroudi M, 2020; Gupta et al., 2010; Yang  
159 et al., 2011). While the CLIP-based m6A signature was no longer detected at adenosine 783 when this  
160 site was mutated to uracil, we detected m6A modification at five of the seven other multi-replicate  
161 consensus sites (Tables S1 and S2, Figure 1B). Nucleotides 143 and 620 were no longer called with  
162 multi-replicate consensus confidence as m6A in the A783U mutant, though m6A143 was only called in  
163 WT HOTAIR at our lowest confidence category and m6A620 is called in one of the A783U mutant  
164 replicates (Table S1). Nonetheless, it is possible that methylation at A783 is required for one or both m6A  
165 events to occur.

166 To determine the effect of the A783U mutation on HOTAIR-mediated breast cancer cell growth,  
167 we measured the doubling time of MDA-MB-231 cells expressing WT and A783U mutant HOTAIR. As

168 described above, we overexpressed HOTAIR and the HOTAIR<sup>A783U</sup> mutant in MDA-MB-231 cells and  
169 included overexpression of an antisense sequence of luciferase mRNA (Anti-Luc) as a negative  
170 control (Meredith et al., 2016). Similar to previous studies, transgenic overexpression of HOTAIR resulted  
171 in 10<sup>3</sup>-10<sup>4</sup> copies of HOTAIR per cell and mediated increased cancer growth and invasion of MDA-MB-  
172 231 cells (Gupta et al., 2010) (Figure 1E-G). We performed cell proliferation assays by plating 5,000 cells  
173 in a 96-well dish and analyzing confluency every 2 hours over a period of 48 hours (example shown in  
174 Figure 1 – figure supplement 3B). We observed that MDA-MB-231 cells overexpressing WT HOTAIR  
175 proliferated more quickly, with a shorter doubling time (~26 hours) than cells overexpressing Anti-Luc  
176 (~28.5 hours, p=0.0003) (Figure 1F and Figure 1 – figure supplement 3C). Surprisingly, the single  
177 nucleotide mutation of A783U in HOTAIR abolished its ability to enhance MDA-MB-231 cell proliferation;  
178 cells expressing HOTAIR<sup>A783U</sup> proliferated more slowly, with a longer doubling time than those expressing  
179 WT HOTAIR (~28.6 hours, p=0.004) and grew similarly to cells containing the Anti-Luc control. To  
180 examine the role of A783 of HOTAIR in mediating breast cancer cell invasion, the same MDA-MB-231  
181 cell lines were plated in a Matrigel invasion assay. Overexpression of WT HOTAIR induced a significant  
182 increase in number of cells invaded compared to the Anti-Luc control (p=0.038). In contrast,  
183 overexpression of A783U HOTAIR did not lead to an increase in invasion compared to the Anti-Luc  
184 control (p=0.22) and resulted in significantly less cells invaded compared to overexpression of WT  
185 HOTAIR (p=0.012) (Figure 1G). Altogether, these results suggest that m6A modification of adenosine  
186 783 in HOTAIR is key for mediating the increased aggressiveness of TNBC that is promoted in contexts  
187 where the lncRNA is overexpressed.

188

### 189 **Overexpression of A783U mutant HOTAIR induces divergent gene expression changes from wild-** 190 **type HOTAIR in breast cancer cells**

191 To analyze HOTAIR-mediated gene expression changes in MDA-MB-231 cells, we performed  
192 high throughput RNA sequencing on cells overexpressing WT HOTAIR, A783U mutant HOTAIR, or the  
193 Anti-Luciferase control. For cells expressing WT HOTAIR, we identified 155 genes that were differentially



194 expressed (adjusted  $p < 0.1$ ) when compared with control cells expressing Anti-Luciferase (Figure 2A).  
195 Upregulated genes in cells expressing WT HOTAIR include genes involved in positive regulation of  
196 angiogenesis ( $p = 1.22E-05$ ), regulation of cell population proliferation ( $p = 0.0361$ ), and cell differentiation  
197 ( $p = 0.0157$ ), while downregulated genes include genes involved in cell adhesion ( $p = 0.0118$ ), p53  
198 ( $p = 0.0112$ ) and MAPK ( $p = 0.0313$ ) signaling, and tumor repressors such as HIC1 and DNMT3A. This set  
199 of genes had significantly different expression in cells overexpressing WT HOTAIR compared to either  
200 cells overexpressing Anti-Luciferase or the A783U mutant HOTAIR (Figure 2A-C). Surprisingly, mutation  
201 of A783 did not merely prevent most gene expression changes seen in wild-type HOTAIR, but instead,  
202 expression of the A783U mutant induced certain changes in the opposite direction from the baseline  
203 control MDA-MB-231 cell line. We confirmed this pattern by qRT-PCR: genes that were upregulated in  
204 MDA-MB-231 cells upon introduction of WT HOTAIR had decreased expression in cells with A783U  
205 mutant HOTAIR (Figure 2B). This included genes such as *PTK7* involved in the Wnt signaling pathway  
206 (fold change relative to control in WT HOTAIR=2.6,  $p = 0.008$ ; in A783U HOTAIR=-1.4,  $p = 0.002$ ); *CDH11*,  
207 a mesenchymal cadherin that is upregulated in invasive breast cancer cell lines (Pishvaian et al., 1999)  
208 (fold change in WT HOTAIR=2.0,  $p = 0.01$ ; in A783U HOTAIR=-1.6,  $p = 0.02$ ); and *GRIN2A*, an oncogenic  
209 glutamate receptor (fold change in WT HOTAIR=2.5,  $p = 0.006$ ; in A783U HOTAIR=-3.7,  $p = 9.3E-05$ ).  
210 Similarly, genes downregulated with WT HOTAIR were significantly increased with A783U HOTAIR,  
211 compared to the parental MDA-MB-231 control, including *SEMA5A*, a guidance cue protein that  
212 suppresses the proliferation and migration of lung adenocarcinoma cells (Ko et al., 2020) (fold change  
213 relative to control in WT HOTAIR=-3.5,  $p = 0.0002$ ; in A783U HOTAIR=2.8,  $p = 0.01$ ); *SIRPA*, a cell surface  
214 receptor that can act as a negative regulator of the phosphatidylinositol 3-kinase signaling and mitogen-  
215 activated protein kinase pathways (Takahashi, 2018) (fold change in WT HOTAIR=-1.6,  $p = 0.03$ ; in A783U  
216 HOTAIR=3.1,  $p = 0.009$ ); and *TP53I11*, a p53-interacting protein that suppresses migration and  
217 metastasis in MDA-MB-231 cells (Xiao et al., 2019) (fold change in WT HOTAIR=-1.7,  $p = 0.03$ ; in A783U  
218 HOTAIR=4.0,  $p = 0.008$ ) (Figure 2C). To further analyze differences in cells expressing A783U mutant  
219 HOTAIR, we performed a pairwise comparison with control MDA-MB-231 cells and identified 758  
220 differentially expressed genes (Figure 2D). Upregulated gene categories in A783U HOTAIR-expressing

221 cells include negative regulation of response to growth factor stimulus ( $p=2.27E-04$ ), positive regulation  
222 of apoptosis ( $p=3.88E-04$ ), and regulation of migration ( $p=4.36E-04$ ), while downregulated gene  
223 categories include regulation of the epithelial to mesenchymal transition ( $p=1.48E-04$ ), angiogenesis  
224 ( $p=1.64E-04$ ), cell adhesion ( $p=7.51E-05$ ), and cell migration ( $p=1.64E-04$ ). We hypothesize that the  
225 altered pattern of gene expression may underlie the slight decrease in cell invasion observed in the  
226 A783U context compared to control MDA-MB-231 cells (Figure 1G).

227 To further investigate differences between cells expressing WT HOTAIR versus the A783U  
228 mutant HOTAIR, we performed a pairwise comparison. Here, we observed the most differentially  
229 expressed genes (2060) compared to other pairwise comparisons (Figure 2E). Overall, these results  
230 reveal that expression of the A783U mutant HOTAIR induces additional and often opposite gene  
231 expression changes compared to expression of WT HOTAIR in breast cancer cells, suggesting a  
232 potential antimorph property of this single nucleotide mutation. The opposite gene expression pattern is  
233 evident in the heat map of all differentially expressed genes (Figure 2 – Figure Supplement 1A), as well  
234 as the observation that most (137/155, 88%) of WT HOTAIR-regulated genes have altered expression  
235 with A783U HOTAIR, with a significant portion (38/155, 25%) having opposite expression in MDA-MB-  
236 231 cells expressing A783U HOTAIR compared to control cells (Figure 2E, Figure 2 – Figure Supplement  
237 1B-C). We hypothesized that prevention of m6A methylation by the A783U mutation disrupts an m6A-  
238 dependent function to cause loss-of-function and antimorph cell biology and gene expression behaviors.

239

#### 240 **hnRNP B1 is not a direct m6A reader in MCF-7 cells**

241 We next sought to address the mechanisms behind HOTAIR m6A783 function. hnRNP A2/B1  
242 has previously been suggested to be a reader of m6A, and the B1 isoform has a high affinity for binding  
243 HOTAIR(Alarcon et al., 2015; Meredith et al., 2016; Yingmin Wu et al., 2019). However, comparing our  
244 previously generated eCLIP results for hnRNP B1(Nguyen, Balas, Griffin, Roberts, & Johnson, 2018) to  
245 the m6A eCLIP, both performed in MCF-7 cells, we found that, out of 10,470 m6A sites, only 417 (4%)  
246 were identified to contain an hnRNP B1 binding site within 1,000 nucleotides (Figure 3 – figure

247 supplement 1A). Upon mapping hnRNP B1 signal intensity relative to the nearby m6A site, we observed  
248 that hnRNP B1 is depleted directly over m6A sites (Figure 3 – figure supplement 1B). These results  
249 suggest that hnRNP B1 is not a direct m6A reader, although m6A may indirectly promote its recruitment  
250 in some contexts. When comparing hnRNP B1 binding in HOTAIR with m6A sites, B1 binding peaks in  
251 MCF-7 cells occur in m6A-free regions of HOTAIR. Conversely, data from *in vitro* eCLIP analysis of B1  
252 binding to unmodified HOTAIR reveal additional B1 binding peaks in Domain 1 of HOTAIR, one of which  
253 occurs near several m6A sites (Figure 3 – figure supplement 1C). Altogether, these data suggest that  
254 m6A is not likely to directly recruit hnRNP B1 as a reader, although it could contribute to hnRNP B1  
255 binding.

256

### 257 **YTHDC1 interacts with HOTAIR to mediate breast cancer proliferation**

258 In light of the results for hnRNP A2B1 described above, we turned to alternative candidate m6A  
259 readers of HOTAIR. YTHDC1 is a nuclear-localized m6A reader that binds m6A sites in noncoding RNAs,  
260 including the Xist lncRNA (Patil et al., 2016). We reasoned that YTHDC1 was a strong candidate for  
261 interaction with HOTAIR, which is a lncRNA that is also primarily nuclear-localized. To determine if  
262 YTHDC1 interacts with HOTAIR, we performed RNA immunoprecipitation (RIP) qRT-PCR using an  
263 antibody to YTHDC1. In both MDA-MB-231 cells overexpressing transgenic HOTAIR, and MCF-7 cells  
264 expressing endogenous HOTAIR, a significant portion of HOTAIR RNA was recovered when using  
265 antibodies specific against YTHDC1 (17.4%,  $p=0.04$ ; 2.6%,  $p=0.003$ , respectively) (Figure 3A-B).

266 To test the role of YTHDC1 in HOTAIR's ability to enhance breast cancer cell proliferation, we  
267 stably overexpressed or knocked down YTHDC1 in the context of WT or A783U HOTAIR overexpression  
268 in MDA-MB-231 cells (Figure 3C-D). We noted that YTHDC1 protein levels tended to be ~2-fold higher  
269 in cells containing WT HOTAIR compared to A783U mutant HOTAIR (Figure 3D). Although this difference  
270 was not significant ( $p=0.16$ ), it suggests a potential positive relationship between WT HOTAIR RNA and  
271 YTHDC1 protein levels. Next, we used the MDA-MB-231 cell lines we generated to analyze proliferation  
272 as described above. Growth of MDA-MB-231 cells overexpressing WT HOTAIR was not significantly

273 altered by YTHDC1 dosage (0.96 fold change,  $p=0.16$  for pLX-DC1; 1.08 fold change,  $p=0.26$  for shDC1,  
274 respectively), yet there was a trend towards decreased doubling time with increasing YTHDC1. In  
275 contrast, cells with A783U mutant HOTAIR had significant differences in doubling time with  
276 overexpression or knockdown of YTHDC1 (Figure 3E). Overexpression of YTHDC1 led to significantly  
277 faster growth of MDA-MB-231 cells containing A783U mutant HOTAIR (0.84-fold change in doubling  
278 time,  $p=0.003$ ), with proliferation rates comparable to cells expressing WT HOTAIR. Knockdown of  
279 YTHDC1 in cells containing HOTAIR<sup>A783U</sup> was particularly potent in reducing the growth rate (~1.2-fold  
280 increase in doubling time,  $p=0.008$ ) demonstrating a role for YTHDC1 in mediating HOTAIR's ability to  
281 enhance proliferation of breast cancer cells through A783, or via other m6A sites in A783U mutant  
282 HOTAIR upon YTHDC1 overexpression.

283

#### 284 **High *HOTAIR* levels are associated with an aggressive disease progression in breast cancer** 285 **patients with high tumor *YTHDC1* expression**

286 To further explore a clinical role for HOTAIR and YTHDC1 in breast cancer, we used GEPIA2, a  
287 web server for large-scale expression profiling and interactive analysis (Tang, Kang, Li, Chen, & Zhang,  
288 2019). To this end, we analyzed the relationship of *HOTAIR* and *YTHDC1* expression in publicly available  
289 outcomes data from breast cancer patient primary tumors. Across all breast cancer patient samples,  
290 *YTHDC1* is generally expressed at the mRNA level, ranging roughly five-fold. HOTAIR levels vary more  
291 widely, with some samples not expressing the lncRNA. Because of these different expression profiles,  
292 there is only a very modest positive correlation between *HOTAIR* and *YTHDC1* ( $R=0.092$ ,  $p=0.0025$ )  
293 (Figure 4 – figure supplement 1A). To further investigate *HOTAIR* and *YTHDC1* in breast tumors, we  
294 used the Kaplan-Meier Plotter to analyze recurrence-free and overall survival of breast cancer  
295 patients (Gyorffy et al., 2010) as well as UALCAN (a tool for analyzing cancer OMICS data) to determine  
296 gene expression in normal breast tissue versus breast tumor specimens (Chandrashekar et al., 2017).  
297 Consistent with previous studies, high expression of *HOTAIR* is indicative of a shorter time to recurrence  
298 ( $HR=1.41$ ,  $p=6.3e-05$ ) (Figure 4A) and shorter overall survival ( $HR=1.65$ ,  $p=0.0084$ ) (Figure 4 – figure

299 supplement 1B)(Arshi A, Raeisi F, Mahmoudi E, Mohajerani F, Kabiri H, Fazel R, Zabihian-Langeroudi  
300 M, 2020; Gupta et al., 2010). *HOTAIR* RNA expression is increased in breast cancer specimens ~7-fold  
301 compared to normal breast tissues ( $p=1.62e-12$ ), with the highest *HOTAIR* expression (~14.5-fold  
302 increase) observed in Stage 4 disease ( $p=5.36e-04$ ) (Figure 4 – figure supplement 1C-D). The reverse  
303 is true for *YTHDC1*, with high levels corresponding to longer disease-free status ( $HR=0.69$ ,  $p=2.5e-11$ )  
304 (Figure 4B) and overall survival ( $HR=0.73$ ,  $p=0.0088$ ) (Figure 4 – figure supplement 2A) and a modest  
305 decrease (~10%) in mRNA levels in tumor compared to normal tissue ( $p=1.14e-06$ ) (Figure 4C, Figure 4  
306 – figure supplement 2B). Interestingly, *YTHDC1* protein is higher in tumor samples compared to normal  
307 tissue ( $p=6.7e-09$ ) (Figure 4D, Figure 4 – figure supplement 2C). This could be because in general there  
308 are fewer epithelial cells in normal breast compared to the number of carcinoma cells in breast  
309 tumors(Rezaul et al., 2010), and may suggest a significant amount of translational regulation for the  
310 *YTHDC1* mRNA.

311 To examine *YTHDC1* in relation to *HOTAIR* in breast cancer outcomes, we assessed recurrence-  
312 free and overall survival based on *HOTAIR* expression in cohorts of tumors expressing either high or low  
313 levels of *YTHDC1* mRNA. In the context of high *YTHDC1* expression, *HOTAIR* is even more strongly  
314 indicative of risk for shorter time to recurrence ( $HR=1.93$ ,  $p=3.2e-05$ ) (Figure 4E) and shorter overall  
315 survival ( $HR=2.1$ ,  $p=0.0012$ ) (Figure 4 – figure supplement 2D) compared to *HOTAIR* alone (Figures 4B,  
316 S6B). On the background of low *YTHDC1*, *HOTAIR* has a less impressive effect on disease-free survival  
317 ( $HR=1.33$ ,  $p=0.007$ ) (Figure 4F), more similar to the effect of *HOTAIR* alone (Figure 4B), and on overall  
318 survival, where *HOTAIR* expression is no longer a significant prognostic indicator ( $HR=1.34$ ,  $p=0.23$ )  
319 (Figure 4 – figure supplement 2E). Altogether, these patient outcomes data are consistent with high  
320 *YTHDC1* levels potentially contributing to the ability of *HOTAIR* to affect breast cancer progression.

321

322 **Mutation at A783 of *HOTAIR* results in decreased interaction with *YTHDC1* *in vitro*, but does not**  
323 **abolish *HOTAIR* methylation or *YTHDC1* interaction at other sites *in vivo***

324 To determine if nucleotide A783 in HOTAIR recruits YTHDC1 via m6A modification, we generated  
325 PP7-tagged *in vitro* transcribed RNA of domain 2 of WT or A783U mutant HOTAIR and performed *in vitro*  
326 m6A methylation with purified METTL3/14 (Jianzhao Liu et al., 2014) and S-adenosylmethionine as a  
327 methyl donor. We then transfected HEK293 cells with an expression plasmid containing FLAG-tagged  
328 YTHDC1 and obtained protein lysates. The *in vitro* HOTAIR transcripts were tethered to IgG-coupled  
329 magnetic beads via a PP7-Protein A fusion protein and incubated with FLAG-YTHDC1-containing protein  
330 lysates. Beads were washed and the relative recovery of FLAG-YTHDC1 was determined by anti-FLAG  
331 Western Blot (Figure 5A). WT HOTAIR interaction with YTHDC1 was enhanced when the transcript was  
332 m6A-modified (~3-fold increase,  $p=0.04$ ), while A783U HOTAIR interaction with YTHDC1 was not  
333 significantly altered by the addition of m6A (~1.3-fold change,  $p=0.6$ ) (Figure 5B-C).

334 To characterize changes to the molecular interactions that occur with mutation of A783 in breast  
335 cancer cells, we performed m6A and YTHDC1 RIP experiments on MDA-MB-231 cells overexpressing  
336 WT or A783U HOTAIR (Figure 5 – figure supplement 1A-B). Surprisingly, we did not see any significant  
337 changes in HOTAIR recovery in either experiment (~1.2-fold change,  $p=0.5$ ; 1.1-fold change,  $p=0.8$  for  
338 m6A and YTHDC1 RIP, respectively). The HOTAIR<sup>A783U</sup> maintains m6A modifications at other sites within  
339 the RNA, which we have mapped in the overexpression context (Table S1). These sites are likely  
340 sufficient for HOTAIR recovery when immunoprecipitating YTHDC1. However, modification of A783, in  
341 particular, appears to be important in mediating the physiological effects observed by HOTAIR  
342 overexpression, likely by YTHDC1 binding to A783 in a methylation-dependent manner, as observed in  
343 the *in vitro* experiment (Figure 5B-C).

344

### 345 **m6A and YTHDC1 mediate chromatin association and expression of HOTAIR**

346 Based on the differences observed between cell lines containing WT and A783U HOTAIR and  
347 the function of HOTAIR in chromatin-mediated gene repression, we investigated whether chromatin  
348 association of HOTAIR was altered in these cells. We performed fractionation of MDA-MB-231 cells  
349 containing WT or A783U HOTAIR or an antisense-Luciferase control into cytoplasm, nucleoplasm, and

350 chromatin fractions (Figure 5D, see Methods). We isolated RNA from each fraction and performed qRT-  
351 PCR for HOTAIR and GAPDH. Cells overexpressing WT HOTAIR had significantly more chromatin-  
352 associated HOTAIR (~4.3-fold) than cells expressing A783U HOTAIR ( $p < 0.05$ ) (Figure 5E), though  
353 overall levels of HOTAIR are unchanged (Figure 2A).

354 To examine the effect of YTHDC1 levels on HOTAIR chromatin association, we performed a  
355 similar fractionation experiment in MDA-MB-231 cells expressing WT or A783U HOTAIR with  
356 overexpression or knockdown of YTHDC1 (Figure 5 – figure supplement 1C). While YTHDC1 levels did  
357 not significantly alter WT HOTAIR chromatin association, overexpression of YTHDC1 increased  
358 HOTAIR<sup>A783U</sup> chromatin association ~1.9-fold to similar levels as WT HOTAIR ( $p = 0.05$ ), and knockdown  
359 resulted in a significant ~10-fold decrease in chromatin association ( $p = 0.01$ ) (Figure 5F). We reason that  
360 the differences observed between WT and A783U mutant HOTAIR are due to a high affinity constitutive  
361 interaction of YTHDC1 with WT HOTAIR at m6A783 that enables chromatin association and is not  
362 affected by knockdown or overexpression. For A783U mutant HOTAIR that does not interact with  
363 YTHDC1 at this position, increasing the concentration of YTHDC1 can drive interaction at other (lower  
364 affinity) m6A sites within the mutated HOTAIR. These interactions occur at a low level in cells with wild-  
365 type YTHDC1 levels, and, since they are low affinity, are most sensitive to knockdown of YTHDC1 (Figure  
366 5 – Figure Supplement 1D). Therefore, the A783U mutant, which only retains these proposed lower  
367 affinity sites, is particularly sensitive to YTHDC1 levels.

368 While HOTAIR expression levels remained similar for DC1 overexpression lines compared to  
369 shNT control lines (0.8 fold change,  $p = 0.3$ ), they were significantly decreased by ~5 to 10-fold in YTHDC1  
370 knockdown lines for both WT and A783U mutant HOTAIR relative to shNT cell lines ( $p = 3.24 \times 10^{-10}$ ) (Figure  
371 5G). These results suggest that YTHDC1 regulates the expression or stability of HOTAIR, independently  
372 of A783. To investigate the role of other m6A sites within HOTAIR, we generated HOTAIR overexpression  
373 constructs containing 6 or 14 adenosine-to-uracil mutations (6xAU and 14xAU, respectively) both of  
374 which included A783U. While WT and A783U HOTAIR expression levels were similarly high, there was

375 a ~50-fold decrease in expression of 6xAU or 14xAU HOTAIR (Figure 5H). This suggests that other m6A  
376 sites within HOTAIR mediate its high expression levels in breast cancer cells.

377

### 378 **Tethering YTHDC1 to A783U mutant HOTAIR restores chromatin association**

379 To more directly examine the effects of YTHDC1 interaction with HOTAIR in the context of the  
380 A783U mutation, we employed a catalytically inactive RNA-targeting Cas protein, dCasRX, which has  
381 previously been used to recruit effectors to specific RNA molecules via a guide RNA (Figure  
382 6A)(Konermann et al., 2018). We transfected MDA-MB-231 cells stably expressing WT or A783U  
383 HOTAIR with a plasmid containing the dCasRX-YTHDC1 fusion protein, in combination with a plasmid  
384 containing either a HOTAIR guide RNA (targeting a 22-nucleotide sequence 7 nucleotides downstream  
385 from A783 in HOTAIR, see Figure 6A) or a non-targeting gRNA. Expression of dCasRX-YTHDC1 was  
386 confirmed by Western blot (Figure 6B). While chromatin association of WT HOTAIR remained  
387 consistently high, chromatin association levels of A783U HOTAIR were only restored to near WT HOTAIR  
388 levels upon transfection with plasmids containing the dCasRX-YTHDC1 fusion protein and the HOTAIR  
389 gRNA ( $p=0.25$  compared to WT HOTAIR). In contrast, chromatin association of A783U HOTAIR  
390 remained low upon transfection of dCasRX-YTHDC1 with a non-targeting guide RNA (~3.7 fold lower  
391 than WT HOTAIR,  $p=0.0066$ ) (Figure 6C). HOTAIR RNA levels remained consistent in all samples  
392 (Figure 6D). These results confirm that YTHDC1 mediates chromatin localization of HOTAIR, and show  
393 that the chromatin association defect of the A783U mutation can be restored simply by restoring binding  
394 of YTHDC1 at that specific location.

395

### 396 **YTHDC1 contributes to gene repression by HOTAIR in the absence of PRC2, independent of its** 397 **role in chromatin association or RNA stability**

398 To determine the effect of YTHDC1 on transcriptional repression mediated by HOTAIR, we used  
399 previously generated reporter cell lines that contain HOTAIR artificially directly tethered to chromatin



400 upstream of a luciferase reporter gene to repress expression, independent of PRC2 (Portoso et al., 2017)  
401 (Figure 7A). We confirmed that HOTAIR tethered upstream of the luciferase reporter reduced luciferase  
402 expression using both qRT-PCR (~2.3-fold lower,  $p=8.0e-12$ ) and luciferase assay (~3.1-fold lower,  
403  $p=0.002$ ) (Figure 7B,C). We also performed m6A eCLIP to confirm that *HOTAIR* was m6A modified in  
404 this context and detected 10 m6A sites within *HOTAIR*, including A783 (Table S1). To test the role of  
405 YTHDC1 in the repression mediated by HOTAIR, we used 3 different siRNAs to knock down YTHDC1  
406 relative to a non-targeting control (~2-fold decrease in protein levels,  $p=0.02$ ) in the HOTAIR-tethered  
407 cells lacking the essential PRC2 subunit EED (Figure 7D). Knockdown of YTHDC1 resulted in  
408 significantly higher luciferase RNA levels in these cells (~2.1 fold change,  $p=2.2e-05$ ) (Figure 7E).  
409 Luciferase enzymatic activity also increased upon YTHDC1 knockdown (~1.3 fold change,  $p=0.03$ )  
410 (Figure 7F). YTHDC1 knockdown did not affect *HOTAIR* RNA levels in this context (~1.2-fold increase,  
411  $p=0.8$ ) (Figure 7 – figure supplement 1A-B), indicating that the effects observed on luciferase expression  
412 were likely due to disruption of the HOTAIR gene repression mechanism via depletion of YTHDC1 protein  
413 rather than loss of HOTAIR expression.

414

## 415 **Discussion**

416 Similar to m6A regulation of mRNAs, it is becoming evident that m6A on lncRNAs is both  
417 functionally diverse and context dependent. Here, we demonstrate that m6A and the m6A reader  
418 YTHDC1 function to enable transcriptional repression by HOTAIR which is analogous to one of the  
419 repressive functions demonstrated for the lncRNA Xist (Nesterova et al., 2019; Patil et al., 2016). Our  
420 results reveal a mechanism whereby m6A modification of HOTAIR at a specific adenosine residue  
421 mediates interaction with YTHDC1, in turn enabling transcriptional interference by HOTAIR which  
422 enhances TNBC properties including proliferation and invasion.

## 423 **Function of specific m6A sites in HOTAIR**

424 While several m6A sites were identified within HOTAIR when overexpressed, we only detected  
425 one m6A site in the endogenously expressed context in MCF-7 cells, making it the most consistently  
426 present methylation site. MDA-MB-231 cells overexpressing HOTAIR containing a mutation of this single  
427 m6A-modified adenosine had a defect in HOTAIR-mediated proliferation and invasion, as well as its  
428 ability to induce HOTAIR-mediated gene expression changes. While A783U mutant HOTAIR appears to  
429 retain m6A modification at other sites and interaction with YTHDC1 *in vivo*, we note that the *in vivo*  
430 analysis employs formaldehyde crosslinking prior to immunoprecipitation with the YTHDC1 antibody,  
431 which enables detection of both weak and strong interactions. It is possible that the A783 m6A site  
432 specifically is a high-affinity site for YTHDC1 interaction based on our *in vitro* analysis where YTHDC1  
433 association with methylated domain 2 of HOTAIR was dependent on this site (Figure 5A-C). In line with  
434 this hypothesis, we observe a decrease in chromatin-association when A783 of HOTAIR is mutated,  
435 which is recovered upon overexpression or direct tethering of YTHDC1 (Figures 5 and 6).

436 While it is evident that m6A modification of A783 in HOTAIR is important for mediating its effects  
437 in breast cancer, other m6A sites within HOTAIR appear to play a role in enabling its high expression  
438 levels, potentially through transcript stabilization. When we bypass the normal mechanism of chromatin  
439 association using a direct tethering approach for HOTAIR (Figure 7A)(Portoso et al., 2017), YTHDC1 is  
440 no longer required for chromatin association or stability, yet is required for gene repression, suggesting  
441 a direct role in shutting down transcription, perhaps with LSD1 involvement(Jarroux et al., 2021; Tsai et  
442 al., 2010). Our work emphasizes the importance of studying the function of individual m6A sites, as each  
443 m6A site has the potential to contribute to the function of an RNA in different ways.

#### 444 *m6A in gene repression and heterochromatin formation*

445 HOTAIR and other lncRNAs make many dynamic and multivalent interactions with proteins that  
446 interact with other proteins, RNA molecules, and chromatin. In the nucleus, the METTL3/14 complex and  
447 YTHDC1 are key interactors with m6A-modified RNA that have been shown to regulate chromatin. Work  
448 in mouse embryonic stem cells has shown that METTL3 interacts with the SETD1B histone modifying  
449 complex, and this plays a role in repression of specific families of endogenous retroviruses(Xu et al.,

450 2021). However, due to the nature of HOTAIR's mechanism of repressing genes in *trans*, it is unlikely  
451 that the METTL3/14 complex remains bound to HOTAIR to induce repression of target loci. For YTHDC1,  
452 recent work has found that RNA interactions with this protein can directly regulate chromatin via  
453 recruitment of KDM3B, promoting H3K9me2 demethylation and gene expression (Y. Li et al., 2020). In  
454 contrast, this study demonstrates that YTHDC1 can act to regulate chromatin association and  
455 transcriptional repression by HOTAIR, although the mechanism by which this is accomplished remains  
456 ambiguous. Our data suggest that YTHDC1-mediated transcriptional repression occurs upstream of  
457 chromatin modification by PRC2. This supports the mechanism of transcriptional interference by HOTAIR  
458 proposed by Portoso et. al. (Portoso et al., 2017) (Figure 1A) and suggests that YTHDC1 is an important  
459 factor that mediates repression by HOTAIR. Yet, it is still unclear how YTHDC1 binding to a repressive  
460 lncRNA mediates transcriptional interference and repression.

#### 461 *Divergence in m6A and YTHDC1 function for different classes of RNAs*

462 The role of YTHDC1 in mediating chromatin association of and repression by HOTAIR is  
463 interesting in the context of the recently identified broad nuclear role of YTHDC1 in regulation of  
464 transcription and chromatin state in mouse embryonic stem cells (Jun Liu et al., 2020). While in this case  
465 it was demonstrated that YTHDC1 mediates degradation of m6A-modified chromatin-associated  
466 regulatory RNAs, our work raises the possibility that YTHDC1 might also mediate transcriptional  
467 repression and/or heterochromatin directly through interaction with regulatory RNAs. Our work also  
468 shows that, rather than degradation of HOTAIR, m6A sites in HOTAIR mediate its high expression in  
469 breast cancer via YTHDC1. An important distinction between HOTAIR and the chromatin-associated  
470 regulatory RNAs investigated by Liu *et. al.* (Jun Liu et al., 2020) is that HOTAIR regulates genes in *trans*  
471 versus *cis*. Liu *et. al.* found that YTHDC1 mediates degradation of *cis*-regulatory RNAs by the NEXT  
472 complex to slow downstream transcription of their target genes; however, in the case of HOTAIR,  
473 YTHDC1 mediates chromatin association of a *trans*-regulatory lncRNA, presumably helping it to repress  
474 its target genes in *trans*. We hypothesize that chromatin association of HOTAIR stabilizes it because  
475 stable retention of HOTAIR on chromatin as heterochromatin forms is likely to make it inaccessible to

476 factors that mediate its degradation. Our experiments where HOTAIR is tethered to chromatin in a  
477 reporter cell line illustrates this, as knockdown of YTHDC1 did not alter the stability of HOTAIR in the  
478 context where it is constitutively tethered to chromatin (Figure 6 – figure supplement 1C). It is likely that  
479 YTHDC1 performs multiple functions within the nucleus, and that its effects on its target RNAs are context  
480 dependent, such as on other nearby RNA binding proteins and/or local chromatin state.

481 Our work also highlights the fate of HOTAIR-YTHDC1 interaction which is distinctly different from  
482 mRNAs whose nuclear export is mediated by YTHDC1(Roundtree et al., 2017). In contrast, we show that  
483 YTHDC1 mediates chromatin association of the primarily nuclear-localized HOTAIR lncRNA. Also, while  
484 one specific m6A site at A783 is important for mediating chromatin association and the physiological  
485 effects of HOTAIR in breast cancer, other m6A sites play a role in overall expression or stability (Figure  
486 8). It is likely that the RNA context and other proteins that either interact directly with YTHDC1 or the RNA  
487 molecules it binds to dictate the effects of YTHDC1 binding to its targets. Another possibility is that  
488 specific modifications on YTHDC1, such as phosphorylation (which has previously been demonstrated  
489 to regulate its localization)(Rafalska et al., 2004), result in interactions with different types of regulatory  
490 RNAs or even different m6A sites within a single RNA, ultimately leading to differing effects (i.e. stability  
491 vs. chromatin association vs. degradation). Additional studies on how YTHDC1 interacts with specific  
492 RNA targets, chromatin, and other proteins in the nucleus will shed light on the mechanisms of YTHDC1  
493 in chromatin regulation.

#### 494 *Antimorphic transformation of HOTAIR function via mutation of a single m6A site*

495 The antimorphic effect of mutating A783 in HOTAIR induced opposite and additional gene  
496 expression changes that ultimately resulted in a less aggressive breast cancer state (Figures 1 and 2).  
497 Our results show that disruption of a single m6A site can convert HOTAIR from eliciting pro- to anti-tumor  
498 effects, allowing overexpression of the converted lncRNA to decrease cancer phenotypes more so than  
499 depletion of the wild-type version. Understanding the mechanism behind this induction of antimorphic  
500 behavior by a single nucleotide mutation and its biological implications will require future work. Altogether,

501 these findings suggest a potential therapeutic approach to oncogenic lncRNAs such as HOTAIR, where  
502 disruption of RNA methylation alone has a greater impact than simple elimination of the RNA.

### 503 Conclusion

504 The context dependency of m6A function is an emerging theme. With various roles in pluripotency  
505 and development and in disease states such as cancer, m6A on different RNA molecules regulates their  
506 fate and functional output in different ways (Meyer et al., 2012; L. Wu, Wu, Ning, Liu, & Zhang, 2019). Our  
507 work illustrates the context of three specific m6A functions: enabling chromatin association, promoting  
508 high levels of lncRNA expression, and facilitating transcriptional repression. We further highlight the  
509 importance of one specific m6A site within a lncRNA that contains multiple sites of modification.

510 As the only primarily nuclear m6A reader, YTHDC1 has the potential to interact with m6A-  
511 containing RNA molecules at the site of transcription on chromatin. The outcome of this interaction  
512 appears to be dictated by the identity of the RNA molecule (including whether it functions in *cis* or *trans*)  
513 and the cell type that it occurs in, but ultimately has the potential to result in chromatin regulation. Our  
514 work demonstrates the importance of YTHDC1 in mediating HOTAIR chromatin association and  
515 transcriptional repression independent of PRC2, revealing a new layer of regulation by m6A at a specific  
516 residue within HOTAIR. Overall, this provides insight into mechanisms of how m6A regulates HOTAIR-  
517 mediated breast cancer metastasis which could ultimately lead to new treatment options (for example,  
518 preventing m6A methylation at this specific site) for patients with tumors that have elevated HOTAIR  
519 levels.

520

### 521 **Materials and Methods**

#### 522 **Cell Culture**

523 MCF-7 cells were maintained in RPMI media (11875093, Invitrogen) and MDA-MB-231 and 293T  
524 in DMEM media (MT10013CV, Fisher Scientific). Media contained 10% FBS (F2442-500ML, Sigma-  
525 Aldrich) and Pen-Strep (MT30002CI, Fisher Scientific) and cells were grown under standard tissue

526 culture conditions. Cells were split using Trypsin (MT25053CI, Fisher Scientific) according to  
527 manufacturer's instructions.

528 MDA-MB-231 cells overexpressing WT HOTAIR, A783U mutant HOTAIR, or Anti-Luciferase were  
529 generated as previously described using retroviral transduction(Meredith et al., 2016). Stable knockdown  
530 of METTL3, METTL14, WTAP, and YTHDC1 and overexpression of YTHDC1 was performed by lentivirus  
531 infection of MCF-7 or MDA-MB-231 cells overexpressing HOTAIR or A783U mutant HOTAIR via Fugene  
532 HD R.8 with pLKO.1-blasticidin shRNA constructs or a pLX304 overexpression construct as noted in  
533 Table S3. Cells were selected with 5 µg/mL blasticidin (Life Technologies). The nontargeting shRNA  
534 pLKO.1-blast-SCRAMBLE was obtained from Addgene (Catalog #26701). Two shRNAs for each target  
535 were obtained and stable lentiviral transductions with the targeted shRNAs and the scramble control were  
536 performed. Cell lines with the most efficient knockdown as determined by western blot were selected for  
537 downstream experiments.

### 538 **Plasmid Construction**

539 The pBABE-puro retroviral vector was used for overexpression of lncRNAs. The spliced HOTAIR  
540 transcript (NR\_003716.3) was synthesized and cloned into the pBABE-puro retroviral vector by  
541 GenScript. An antisense transcript of the firefly luciferase gene (AntiLuc) was amplified from the pTRE3G-  
542 Luciferase plasmid (Clontech), then cloned into the pBABE-puro retroviral vector. These were generated  
543 in a previous publication(Meredith et al., 2016).

544 To create the A783U mutant HOTAIR overexpression plasmid, staggered QuikChange oligos  
545 AG66/AG67 were used to generate the A783U mutation in pTRE3G-HOTAIR using the QuikChange Site  
546 Directed Mutagenesis Kit (Agilent 200519) to generate pTRE3G-A783U\_HOTAIR. A 1.6Kb fragment of  
547 A783U mutant HOTAIR was amplified with primers AG68/AG69 from pTRE3G-A783U\_HOTAIR for  
548 cloning into pBABE-Puro-HOTAIR cut with XcmI and BamHI by Gibson Assembly. Oligonucleotide  
549 sequences are noted in Table S4. All constructs were confirmed by sequencing. pBABE-Puro-  
550 6xAU\_HOTAIR and pBabe-Puro-14xAU\_HOTAIR were synthesized and cloned by GenScript.

551 Plasmids for the knockdown of METTL3, METTL14, WTAP, and YTHDC1 were generated by  
552 cloning the shRNA (RNAi Consortium shRNA Library) from pLKO.1-puro into the pLKO.1-blast backbone  
553 (Addgene #26655).

554 To generate the plasmid for tethering YTHDC1 to HOTAIR via dCasRX, we first constructed a  
555 pCDNA-FLAG plasmid by inserting a 5xFLAG sequence (synthesized as a gBlock by IDT DNA) into the  
556 HindIII/XbaI site of pCDNA3 (Invitrogen). YTHDC1 was then amplified from pLX304-YTHDC1 (ORF clone  
557 ccsdBroad304\_04559) with oligonucleotides noted in Table S4, and cloned into the KpnI/NotI site of  
558 pCDNA-FLAG to generate pCDNA-FLAG-YTHDC1 (pAJ367). The FLAG-YTHDC1 sequence was  
559 amplified then cloned downstream of dCasRX at NheI in the pXR002 plasmid (pXR002: EF1a-dCasRx-  
560 2A-EGFP was a gift from Patrick Hsu (Addgene plasmid # 109050; <http://n2t.net/addgene:109050>;  
561 RRID:Addgene\_109050)) using oligonucleotides noted in Table S4. Expression of the dCasRX-YTHDC1  
562 fusion protein was confirmed by transfection of the plasmid followed by Western Blot with anti-FLAG M2  
563 mouse monoclonal antibody (F1804, Sigma-Aldrich) and anti-YTHDC1 (14392-1-AP, Proteintech).  
564 Plasmids containing guide RNAs were generated using the pXR003 backbone plasmid (pXR003: CasRx  
565 gRNA cloning backbone was a gift from Patrick Hsu (Addgene plasmid # 109053;  
566 <http://n2t.net/addgene:109053>; RRID:Addgene\_109053)) cut with BbsI, using oligonucleotides noted in  
567 Table S4. All plasmids were confirmed by sequencing.

## 568 **m6A enhanced crosslinking immunoprecipitation:**

### 569 *polyA isolation and RNA fragmentation*

570 For each experiment, approximately 100 µg of total RNA was isolated from cells with TRIzol  
571 according to manufacturer's instructions. 10 µg PolyA RNA was isolated using Magnosphere® Ultrapure  
572 mRNA Purification Kit (Takara) according to manufacturer's instructions. PolyA RNA was ethanol  
573 precipitated with 2.5 M Ammonium Acetate and 70% ethanol in a solution containing 50 µg/ml GlycoBlue  
574 Co-precipitant (AM9515, Invitrogen). RNA was resuspended in 10 µl and fragmented with 10x  
575 Fragmentation Buffer (AM8740, Invitrogen) at 75°C for 8 minutes and immediately quenched with 10x

576 Stop Reagent (AM8740, Invitrogen) and placed on ice to generate fragments 30-150 nucleotides in  
577 length.

#### 578 *Anti-m6A-RNA crosslinking and bead conjugation*

579 Crosslinked RNA-Antibody was generated as previously described(Grozhiik, Linder, Olarerin-  
580 George, & Jaffrey, 2017). Fragmented RNA was resuspended in 500 µl Binding/Low Salt Buffer (50 mM  
581 Tris-HCl pH 7.4, 150 mM Sodium Chloride, 0.5% NP-40) containing 2 µl RNase Inhibitor (M0314, NEB)  
582 and 10 µl m6A antibody (ab151230, Abcam), and incubated for 2 hours at room temperature with rotation.  
583 RNA-Antibody sample was transferred to one well of a 12-well dish and placed in a shallow dish of ice.  
584 Sample was crosslinked twice at 150 mJ/cm<sup>2</sup> using a Stratagene Stratalinker UV Crosslinker 1800 and  
585 transferred to a new tube. 50 µl Protein A/G Magnetic Beads (88803, Pierce) were washed twice with  
586 Binding/Low Salt Buffer, resuspended in 100 µl Binding/Low Salt Buffer, and added to crosslinked RNA-  
587 Antibody sample. Beads were incubated at 4°C overnight with rotation.

#### 588 *eCLIP library preparation*

589 RNA was isolated and sequencing libraries were prepared using a modified enhanced CLIP  
590 protocol(Van Nostrand et al., 2016). Beads were washed twice with High Salt Wash Buffer (50 mM Tris-  
591 HCl pH 7.4, 1 M Sodium Chloride, 1 mM EDTA, 1% NP-40, 0.5% Sodium Deoxycholate, 0.1% Sodium  
592 Dodecyl Sulfate), once with Wash Buffer (20 mM Tris-HCl pH 7.4, 10 mM Magnesium Chloride, 0.2%  
593 Tween-20), once with Wash Buffer and 1x Fast AP Buffer (10 mM Tris pH 7.5, 5 mM Magnesium Chloride,  
594 100 mM Potassium Chloride, 0.02% Triton X-100) combined in equal volumes, and once with 1x Fast AP  
595 Buffer. Beads were resuspended in Fast AP Master Mix (1x Fast AP Buffer containing 80U RNase  
596 Inhibitor (M0314, NEB), 2U TURBO DNase (AM2238, Invitrogen), and 8U Fast AP Enzyme (EF0654,  
597 Thermo Scientific)) was added. Samples were incubated at 37°C for 15 minutes shaking at 1200 rpm.  
598 PNK Master Mix (1x PNK Buffer (70 mM Tris-HCl pH 6.5, 10 mM Magnesium Chloride), 1 mM  
599 Dithiothreitol, 200U RNase Inhibitor, 2U TURBO DNase, 70U T4 PNK (EK0031, Thermo Scientific)) was  
600 added to the samples and they incubated at 37°C for 20 minutes shaking at 1200 rpm.



601           Beads were washed once with Wash Buffer, twice with Wash Buffer and High Salt Wash Buffer  
602 mixed in equal volumes, once with Wash Buffer, once with Wash Buffer and 1x Ligase Buffer (50 mM  
603 Tris pH 7.5, 10 mM Magnesium Chloride) mixed in equal volumes, and twice with 1x Ligase Buffer. Beads  
604 were resuspended in Ligase Master Mix (1x Ligase Buffer, 1 mM ATP, 3.2% DMSO, 18% PEG 8000,  
605 16U RNase Inhibitor, 75U T4 RNA Ligase I (M0437, NEB)), two barcoded adaptors were added (X1a  
606 and X1b, see Table S5), and samples were incubated at room temperature for 75 minutes with flicking  
607 every 10 minutes. Beads were washed once with Wash Buffer, once with equal volumes of Wash Buffer  
608 and High Salt Wash Buffer, once with High Salt Wash Buffer, once with equal volumes of High Salt Wash  
609 Buffer and Wash Buffer, and once with Wash Buffer. Beads were resuspended in Wash Buffer containing  
610 1x NuPAGE LDS Sample Buffer (NP0007, Invitrogen) and 0.1M DTT, and incubated at 70°C for 10  
611 minutes shaking at 1200 rpm.

612           Samples were cooled to room temperature and supernatant was ran on Novex NuPAGE 4-12%  
613 Bis-Tris Gel (NP0321, Invitrogen). Samples were transferred to nitrocellulose membrane, and  
614 membranes were cut and sliced into small pieces between 20 kDa and 175 kDa to isolate RNA-antibody  
615 complexes. Membrane slices were incubated in 20% Proteinase K (03508838103, Roche) in PK Buffer  
616 (100 mM Tris-HCl pH 7.4, 50 mM NaCl, 10 mM EDTA) at 37°C for 20 minutes shaking at 1200 rpm. PK  
617 Buffer containing 7M urea was added to samples and samples were incubated at 37°C for 20 minutes  
618 shaking at 1200 rpm. Phenol:Chloroform:Isoamyl Alcohol (25:24:1) (P2069, Sigma-Aldrich) was added  
619 to samples and samples were incubated at 37°C for 5 minutes shaking at 1100 rpm. Samples were  
620 centrifuged 3 minutes at 16,000 x g and aqueous layer was transferred to a new tube.

621           RNA was isolated using RNA Clean & Concentrator-5 Kit (R1016, Zymo) according to  
622 manufacturer's instructions. Reverse transcription was performed using AR17 primer (Table S5) and  
623 SuperScript IV Reverse Transcriptase (18090010, Invitrogen). cDNA was treated with ExoSAP-IT  
624 Reagent (78201, Applied Biosystems) at 37°C for 15 minutes, followed by incubation with 20 mM EDTA  
625 and 0.1M Sodium Hydroxide at 70°C for 12 minutes. Reaction was quenched with 0.1M Hydrochloric  
626 Acid. cDNA was isolated using Dynabeads MyONE Silane (37002D, ThermoFisher Scientific) according

627 to manufacturer's instructions. 20% DMSO and rand3Tr3 adaptor (Table S5) was added to samples, and  
628 samples were incubated at 75° for 2 minutes. Samples were placed on ice and Ligation Master Mix (1x  
629 NEB Ligase Buffer, 1mM ATP, 25% PEG 8000, 15U T4 RNA Ligase I (NEB)) was added to samples.  
630 Samples were mixed at 1200 rpm for 30 seconds prior to incubation at room temperature overnight.

631 cDNA was isolated using Dynabeads MyONE Silane according to manufacturer's instructions and  
632 eluted with 10 mM Tris-HCl pH 7.5. A 1:10 dilution of cDNA was used to quantify the cDNA library by  
633 qPCR using a set of Illumina's HT Seq primers, and Ct values were used to determine number of cycles  
634 for PCR amplification of cDNA. The undiluted cDNA library was amplified by combining 12.5µL of the  
635 sample with 25µL Q5 Hot Start PCR Master Mix and 2.5µL (20µM) of the same indexed primers used  
636 previously. Amplification for the full undiluted sample used 3 cycles less than the cycle selected from the  
637 diluted sample. The PCR reaction was isolated using HighPrep PCR Clean-up System (AC-60050,  
638 MAGBIO) according to manufacturer's instructions.

639 The final sequencing library was gel purified by diluting the sample with 1x Orange G DNA loading  
640 buffer and running on a 3% quick dissolve agarose gel containing SYBR Safe Dye (1:10,000). Following  
641 gel electrophoresis, a long wave UV lamp was used to extract DNA fragments from the gel ranging from  
642 175 to 300 base pairs. The DNA was isolated using QiaQuick MinElute Gel Extraction Kit (28604,  
643 Qiagen). The purified sequencing library was analyzed via TapeStation using DNA ScreenTape (either  
644 D1000 or HS D1000) according to the manufacturer's instructions to assess for appropriate size and  
645 concentration (the final library should be between 175 and 300 base pairs with an ideal concentration of  
646 at least 10nM).

#### 647 *Sequencing and analysis*

648 Samples were sequenced at the Genomics and Microarray Shared Resource facility at University  
649 of Colorado Denver Cancer Center on an Illumina MiSeq or NovaSEQ6000 with 2x 150 base pair paired-  
650 end reads to generate 40 million raw reads for each sample. Computational analysis methods are  
651 described in (Roberts et al., 2020). Briefly, a custom Snakemake workflow was generated based on the  
652 original eCLIP analysis strategies (Van Nostrand et al., 2016) to map reads to the human genome. To

653 identify m6A sites, we used a custom analysis pipeline to identify variations from the reference genome  
654 at single-nucleotide resolution across the entire genome. We then employed an internally developed Java  
655 package to identify C-to-T mutations occurring 1) within the m<sup>6</sup>A consensus motif 'RAC': 'R' is any purine,  
656 A or G; A being the methylated adenosine; and C where the mutation occurs; and 2) within a frequency  
657 range of greater than or equal to 2.5% and less than or equal to 50% of the total reads at a given position  
658 (with a minimum of 3 C-to-T mutations at a single site). The resulting m<sup>6</sup>A sites were then compared to  
659 those identified in the corresponding input sample and any sites occurring in both were removed from  
660 the final list of m<sup>6</sup>A sites (this eliminates any mutations that are not directly induced from the anti-m<sup>6</sup>A  
661 antibody crosslinking). Full transcriptome data associated with the methods manuscript (Roberts et al.,  
662 2020) is at GEO accession # GSE147440. Access token available on request to reviewers and data will  
663 be publicly available at publication.

#### 664 **m6A RNA Immunoprecipitation (meRIP)**

665 Total RNA was isolated with TRIzol (15596018, Invitrogen) according to the manufacturer's  
666 instructions. RNA was diluted to 1 µg/µl and fragmented with 1x Fragmentation Buffer (AM8740,  
667 Invitrogen) at 75°C for 5 minutes. 1x Stop Reagent (AM8740, Invitrogen) was added immediately  
668 following fragmentation and samples placed on ice. 500 ng of input sample was reserved in 10 µl  
669 nuclease free water for qRT-PCR normalization. Protein A/G Magnetic Beads (88803, Pierce) were  
670 washed twice with IP Buffer (20 mM Tris pH 7.5, 140 mM NaCl, 1% NP-40, 2mM EDTA) and coupled  
671 with anti-m6A antibody (ab151230, Abcam) or an IgG control (NB810-56910, Novus) for 1 hour at room  
672 temperature. Beads were washed 3 times with IP Buffer. 10 µg fragmented RNA and 400U RNase  
673 inhibitor was added to 1 ml IP Buffer. Antibody-coupled beads were resuspended in 500 µl RNA mixture  
674 and incubated 2 hours to overnight at 4°C on a rotor. Beads were washed 5 times with cold IP Buffer.  
675 Elution Buffer (1x IP Buffer containing 10 U/µl RNase inhibitor and 0.5 mg/ml N6-methyladenosine 5'-  
676 monophosphate (M2780, Sigma-Aldrich) was prepared fresh and kept on ice. Samples were eluted with  
677 200 µl Elution Buffer for 2 hours at 4°C on a rotor. Supernatant was removed and ethanol precipitated  
678 with 2.5M Ammonium Acetate, 70% Ethanol, and 50 µg/ml GlycoBlue Coprecipitant (Invitrogen AM9515).

679 RNA was washed with 70% ethanol, dried for 10 minutes at room temperature, and resuspended in 10  
680  $\mu$ l nuclease free water. RNA was quantified by nanodrop and 200 ng RNA was reverse transcribed using  
681 High Capacity cDNA Reverse Transcription Kit (4368814, ThermoFisher Scientific) and quantified by  
682 qPCR (oligonucleotides listed in Table S6), and fraction recovered was calculated from Input and IP  
683 values.

#### 684 **RNA Immunoprecipitation of YTHDC1**

685 Actively growing cells from 70-90% confluent 15-cm dishes were trypsinized and washed twice  
686 with ice-cold 1x PBS. Cell pellet was resuspended in 1% V/V Formaldehyde (28908, Pierce) in 1x PBS  
687 and incubated at room temperature for 10 minutes on a rotor. Crosslinking was quenched with 0.25 M  
688 glycine at room temperature for 5 minutes. Cells were washed 3 times with ice-cold 1x PBS and placed  
689 on ice. 20  $\mu$ l Protein A/G beads were washed twice with RIPA Binding Buffer (50 mM Tris-HCl pH 7.4,  
690 100 mM Sodium Chloride, 1% NP-40, 0.1% Sodium Dodecyl Sulfate, 0.5% Sodium Deoxycholate, 4 mM  
691 Dithiothreitol, 1x Protease Inhibitors), resuspended in 1 ml RIPA Binding Buffer, and split to two 0.5 ml  
692 aliquots. 2  $\mu$ g YTHDC1 antibody (ab122340, Abcam) or an IgG Control (sc-2027, Santa Cruz  
693 Biotechnology) was added to beads and incubated for 2 hours at 4°C on a rotor. Fixed cells were  
694 resuspended in 1 ml RIPA Binding Buffer and placed in the Bioruptor Pico (B01060010, Diagenode) for  
695 10 cycles of 30 seconds on, 30 seconds off. Lysates were digested with TURBO DNase for 5 minutes at  
696 37°C with mixing at 1000 rpm and transferred to ice for 5 minutes. Lysates were clarified by centrifugation  
697 at 17,000g at 4°C for 10 minutes and supernatant was transferred to a new tube. 200U RNase Inhibitor  
698 was added to the 1 ml clarified lysate. A 5% aliquot was removed and processed downstream with IP  
699 samples. A 2% aliquot was removed and diluted with 1x SDS Sample Buffer (62.5 mM Tris-HCl pH 6.8,  
700 2.5% SDS, 0.002% Bromophenol Blue, 5%  $\beta$ -mercaptoethanol, 10% glycerol) and protein input and  
701 recovery was monitored by Western Blot. Antibody-coupled beads were washed 3 times with RIPA  
702 Binding Buffer and resuspended in half of the remaining lysate. Samples were incubated overnight at  
703 4°C on a rotor. Beads were washed 5 times with RIPA Wash Buffer (50 mM Tris-HCl pH 7.4, 1 M Sodium  
704 Chloride, 1% NP-40, 0.1% Sodium Dodecyl Sulfate, 0.5% Sodium Deoxycholate, 1 M Urea, 1x Protease

705 Inhibitors) and resuspended in 100 µl RNA Elution Buffer (50 mM Tris-HCl pH 7.4, 5 mM EDTA, 10 mM  
706 Dithiothreitol, 1% Sodium Dodecyl Sulfate). Input sample was diluted with 1x RNA Elution Buffer.  
707 Formaldehyde crosslinks in both input and IP samples were reversed by incubation at 70°C for 30  
708 minutes at 1000 rpm. Supernatant was transferred to a new tube and RNA was isolated using TRIzol-LS  
709 according to the manufacturer's instructions. Reverse transcription was performed on 100 ng RNA using  
710 SuperScript IV Reverse Transcriptase. qPCR was performed as described below.

### 711 **RNA Isolation and qRT-PCR**

712 RNA was isolated with TRIzol (Life Technologies) with extraction in chloroform followed by  
713 purification with the RNeasy kit (Qiagen). Samples were DNase treated using TURBO DNase (Ambion).  
714 Reverse transcription was performed using the cDNA High Capacity Kit (Life Technologies). qPCR was  
715 performed using Sybr Green master mix (Takyon, AnaSpec Inc.) using the primers listed in Table S6 on  
716 a C1000 Touch Thermocycler (BioRad). EEF1A1 primer sequences were obtained from the Magna  
717 MeRIP m6A kit (17-10499, Sigma-Aldrich). Sequences for Luciferase primers (LucR2) were obtained  
718 from a previous publication (Vaquero et al., 2004). Three qPCR replicates were performed for each  
719 sample, and these technical replicates were averaged prior to analysis of biological replicates. At least 3  
720 biological replicates were performed for each qPCR experiment.

### 721 **Cell Proliferation Assays**

722 Three independent clones, here defined as a pool of selected cells stably expressing the pBabe  
723 plasmid, were analyzed for cell proliferation. 2,000 cells were plated in a 96-well dish in DMEM media  
724 containing 10% FBS and selective antibiotics (1µg/ml puromycin (P8833, Sigma-Aldrich) and/or 5µg/ml  
725 blasticidin (71002-676, VWR)), allowed to settle at room temperature for 20 minutes, then placed in an  
726 Incucyte® S3 (Sartorius). Pictures were taken with a 10x magnification every 2 hours for 48 hours using  
727 a Standard scan. Confluency was determined using the Incucyte ZOOM software. Growth rate was  
728 calculated from % confluency using the Least Squares Fitting Method (Roth, 2006).

### 729 **Cell Invasion Assays**

730 MDA-MB-231 cell lines were grown to 70-90% confluence and serum starved in OptiMEM for ~20  
731 hours prior to setting up the experiment. Cells were washed, trypsinized, and resuspended in 0.5% serum  
732 DMEM. 10% serum DMEM was added to the bottom chamber of Corning Matrigel™ Invasion Chambers  
733 (Corning 354481), and 200,000 cells were plated in the top chamber in 0.5% serum DMEM. Cells were  
734 incubated for 22 hours at 37°C followed by 4% PFA fixation and 0.1% Crystal Violet staining. Matrigel  
735 inserts were allowed to dry overnight, followed by brightfield imaging with a 20X air objective. Four  
736 biological replicates were performed, with technical duplicates in each set. For each Matrigel insert, four  
737 fields of view were captured, and cells were counted in Fiji (eight data points per condition, per biological  
738 replicate). The violin plot includes all of the data points, while statistical analysis was performed on the  
739 average number of cells/field for each biological replicate.

#### 740 **Gene Expression Analyses**

741 Total RNA was extracted from MDA-MB-231 cells using TRIzol (Life Technologies) with extraction  
742 in chloroform followed by purification with the RNeasy kit (Qiagen). Samples were DNase treated using  
743 TURBO DNase (Ambion). polyA-selected sequencing libraries were prepared and sequenced by The  
744 Genomics Shared Resource at the University of Colorado Cancer Center. Differential gene expression  
745 analysis was performed using Salmon and DESeq2 (Love, Huber, & Anders, 2014; Patro, Duggal, Love,  
746 Irizarry, & Kingsford, 2017). Briefly, the reads were quantified using salmon to generate transcript  
747 abundance estimates and then DESeq2 was used to determine differential expression between samples.  
748 Heat maps were generated by using normalized read counts of genes that were significantly ( $p < 0.1$ )  
749 differentially expressed between conditions to generate Z-scores. GO term enrichment analysis was  
750 performed using the GO Consortium's online PANTHER tool (Ashburner et al., 2000; Mi, Muruganujan,  
751 Ebert, Huang, & Thomas, 2019; "The Gene Ontology resource: enriching a GOld mine.," 2021).

#### 752 **Purification of METTL3/14**

753 Suspension-adapted HEK293 cells (Freestyle™ 293-F cells, R790-07, Life Technologies) were  
754 grown as recommended in Freestyle™ 293 Expression Medium (12338026, Life Technologies,) shaking  
755 at 37°C in 5% CO<sub>2</sub>. Cells were grown to a concentration of  $3 \times 10^6$  cells/ml and diluted to  $1 \times 10^6$  cells/ml

756 in 50 ml 293F Freestyle Media 24 hours prior to transfection. Before transfection, cells were spun down  
757 and resuspended in 50 ml fresh 293F Freestyle Media at a concentration of  $2.5 \times 10^6$  cells/ml. Expression  
758 plasmid (pcDNA3.1-FLAG-METTTL3, pcDNA3.1-FLAG-METTTL14) were added to the flask at a  
759 concentration of 1.5  $\mu$ g, and flask was shaken in the incubator for 5 minutes. 9  $\mu$ g/ml PEI was added to  
760 the flask and cells were returned to incubator. After 24 hours of growth, an additional 50 ml fresh 293F  
761 Freestyle Media was added and culture was supplemented with 2.2 mM VPA. Cells were harvested as  
762 two 50 ml pellets 72 hours after addition of VPA.

763 Cell pellets were resuspended in 1x Lysis Buffer (50 mM Tris pH 7.4, 150 mM Sodium Chloride,  
764 1 mM EDTA, 1% TritonX-100, 1x Protease inhibitors) to obtain a concentration of  $10^7$  cells/ml and  
765 incubated for 20 minutes at 4°C with rotation. Cell lysate was clarified by centrifugation at 4°C, 12,000 x  
766 g for 15 minutes. Supernatant was transferred to a new tube and kept on ice. Anti-FLAG M2 affinity resin  
767 was equilibrated with 1x Lysis Buffer by washing 3 times. Equilibrated resin was resuspended in 1x Lysis  
768 Buffer and added to the tube containing the clarified lysate. Sample was incubated for 2 hours at 4°C  
769 with rotation. Resin was pelleted by centrifugation at 4°C, 500 x g. Supernatant was removed, and resin  
770 was washed 3 times with 1x Wash Buffer (50 mM Tris pH 7.4, 150 mM Sodium Chloride, 10% Glycerol,  
771 1 mM Dithiothreitol) for 5 minutes each at 4°C with rotation. Sample was equilibrated to room temperature  
772 and resin was resuspended in 1x Wash Buffer containing 0.2 mg/ml 3xFLAG Peptide. Samples were  
773 incubated at room temperature for 10 minutes shaking at 1000 rpm, centrifuged for 2 minutes at 1000 x  
774 g, and supernatant was reserved (elution 1). Elution was repeated twice to obtain two additional elution  
775 samples (elution 2 and 3). Samples were analyzed by Coomassie to determine protein concentration and  
776 purity. Samples were aliquoted and stored at -80°C and thawed on ice prior to use in *in vitro* m6A  
777 methylation experiments.

### 778 ***In vitro* m6A methylation and interaction assays**

779 All plasmids and oligonucleotides used in this assay are listed in Table S7. Using PCR, we  
780 generated a DNA fragment for Domain 2 of wild-type (pTRE3G-HOTAIR, pAJ171) and A783U (pTRE3G-  
781 A783U\_HOTAIR, pAJ385) mutant HOTAIR using primers MB88 and MB89. A 5' T7 promoter and 3' RAT

782 tag were added to the sequence via PCR with primers MB22 and MB94. *in vitro* transcription of the PCR  
783 templates was completed using the MEGAScript T7 Transcription Kit (AM1334, ThermoFisher Scientific)  
784 according to the manufacturer's instructions, and RNA was purified using the RNeasy Mini Kit (Qiagen  
785 75106). 500 nM RNA was diluted in 1x Methyltransferase Buffer (20 mM Tris pH 7.5, 0.01% Triton-X 100,  
786 1 mM DTT) in reactions containing 50  $\mu$ M SAM and 500 nM purified METTL3/14 (+m6A) for 1 hour at  
787 room temperature. Control reactions contained no METTL3/14 (-m6A). RNA was purified using the  
788 RNeasy Mini Kit according to manufacturer's instructions.

789 To obtain FLAG-tagged YTHDC1 protein, 293 cells were transfected using Lipofectamine 2000  
790 (11668030, ThermoFisher Scientific) with plasmid YTHDC1-FLAG and cell lysates were generated as  
791 previously described (Meredith et al., 2016). Dynabeads (M270, Invitrogen) were resuspended in high-  
792 quality dry Dimethylformamide at a concentration of  $2 \times 10^9$  beads/ml. Dynabeads were stored at 4°C  
793 and equilibrated to room temperature prior to use. Dynabeads were washed in 0.1 M Sodium Phosphate  
794 Buffer (pH 7.4) and vortexed for 30 seconds. A second wash was repeated with vortexing and incubation  
795 at room temperature for 10 minutes with rotation. 1 mg/ml IgG solution was prepared by diluting rabbit  
796 IgG (15006, Sigma) in 0.1 M Sodium Phosphate Buffer. Washed beads were resuspended in 0.1 M  
797 Sodium Phosphate Buffer at a concentration of  $3 \times 10^9$  beads/ml, and an equal volume of 1 mg/ml IgG  
798 was added. Samples were vortexed briefly and an equal volume of 3M Ammonium Sulfate was added  
799 and samples were mixed well. Samples were incubated at 37°C for 18-24 hours with rotation. Samples  
800 were washed once briefly with 0.1 M Sodium Phosphate Buffer, then twice with incubation at room  
801 temperature for 10 minutes with rotation. Samples were washed in Sodium Phosphate Buffer + 1%  
802 TritonX-100 at 37°C for 10 minutes with rotation. A quick wash with 0.1 M Sodium Phosphate Buffer was  
803 performed and followed by 4 washes in 0.1 M Citric Acid pH 3.1 at a concentration of  $2 \times 10^8$  beads/ml  
804 at room temperature for 10 minutes with rotation. After a quick wash with 0.1 M Sodium Phosphate Buffer,  
805 beads were resuspended to  $1 \times 10^9$  beads/ml in 1x PBS + 0.02% Sodium Azide and stored at 4°C prior  
806 to use.



807 800 ng of +/-m6A RNA was incubated with 150 ng PrA-PP7 fusion protein in HLB300 (20 mM  
808 Hepes pH 7.9, 300 mM sodium chloride, 2 mM magnesium chloride, 0.1% NP-40, 10% glycerol, 0.1 mM  
809 PMSF, 0.5 mM DTT). RNA was prebound to PP7 for 30 minutes at 25°C, 1350 rpm. 75 µl IgG-coupled  
810 Dynabeads were washed with HLB300 twice and resuspended in 250 µl HLB300. 50 µl beads were  
811 added to each tube of RNA-PP7 and samples were incubated 1 hour at 25°C, 1350 rpm. Beads were  
812 washed twice with HLB300 and resuspended in 80 µl Binding Buffer (10 mM Hepes pH 7.4, 150 mM  
813 potassium chloride, 3 mM magnesium chloride, 2 mM DTT, 0.5% NP-40, 10% glycerol, 1mM PMSF, 1x  
814 protease inhibitors) containing 80U RNase Inhibitor. 25 µg YTHDC1-FLAG containing lysate and 800 ng  
815 competitor RNA (IVT untagged HOTAIR D2) was added to each sample. Samples were incubated at 4°C  
816 for 2.5 hours on a rotor. Beads were washed 3 times with cold Wash Buffer (200 mM Tris-HCl pH 7.4,  
817 200 mM sodium chloride, 2 mM magnesium Chloride, 1 mM DTT, 1x protease inhibitors) and  
818 resuspended in 1x SDS loading buffer. A 10% protein input sample was diluted in 1x SDS loading buffer.  
819 Samples were boiled 5 minutes at 95°C and supernatant transferred to a new tube. Half of each sample  
820 was loaded on a 10% acrylamide gel and Western Blot was performed using anti-FLAG antibody.

## 821 **Fractionation**

822 Cells were grown in 15-cm dishes to 70-90% confluency. Cells were released with Trypsin  
823 (Corning), washed once with 1x PBS containing 1 mM EDTA, and split into two volumes. 1/4 of the  
824 sample was harvested in TRIzol and RNA isolated with RNeasy kit for the input RNA sample. The  
825 remaining ¾ of the sample was fractionated into cytoplasmic, nucleoplasmic, and chromatin-associated  
826 samples. Cells were lysed in cold Cell Lysis Buffer (10 mM Tris-HCl pH 7.5, 0.15% NP-40, 150 mM  
827 Sodium Chloride) containing RNase inhibitors for 5 minutes on ice. Lysate was layered onto 2.5 volumes  
828 of Sucrose Cushion (10mM Tris-HCl pH7.5, 150 mM Sodium Chloride, 24% Sucrose) containing RNase  
829 inhibitors. Samples were centrifuged for 10 minutes at 17,000xg at 4°C. Supernatant was collected  
830 (Cytoplasmic sample). Pellet was rinsed with 1x PBS containing 1 mM EDTA and resuspended in cold  
831 Glycerol Buffer (20 mM Tris-HCl pH 7.9, 75 mM Sodium Chloride, 0.5 mM EDTA, 0.85 mM DTT, 0.125  
832 mM PMSF, 50% Glycerol) containing RNase inhibitors. An equal volume of cold Nuclei Lysis Buffer (10

833 mM HEPES pH 7.6, 1 mM DTT, 7.5 mM Magnesium Chloride, 0.2 mM EDTA, 0.3 M Sodium Chloride,  
834 1M Urea, 1% NP-40) was added and sample was briefly vortexed twice for 2 seconds. Samples were  
835 incubated on ice 2 minutes and centrifuged for 2 minutes at 17,000xg at 4°C. Supernatant was collected  
836 (Nucleoplasmic sample). The remaining pellet was resuspended in 1x PBS containing 1 mM EDTA  
837 (Chromatin-associated sample). Each sample was subjected to TURBO DNase digestion at 37°C for 30  
838 minutes in 1x TURBO Buffer and 10 U TURBO for cytoplasmic and nucleoplasmic samples, or 40U  
839 TURBO for chromatin-associated sample. Reactions were quenched with 10mM EDTA and 3 volumes  
840 of TRIzol-LS was added. RNA isolation was performed as recommended by manufacturer. Samples were  
841 quantified by nanodrop to determine RNA concentration and ran on a 2% agarose gel to confirm RNA  
842 integrity. qRT-PCR was performed on 2 µg of RNA and normalized to RNA recovery, input values, and  
843 GAPDH.

#### 844 **dCasRX-YTHDC1 and gRNA Transfection**

845 One plasmid containing dCasRX-FLAG-YTHDC1 in pXR002 in combination with one plasmid  
846 containing the designated guide RNA in pXR003 (see description in Plasmid Construction) were  
847 transfected into a 70-90% confluent 10-cm dish using Lipofectamine 2000 (11668030, Invitrogen)  
848 according to manufacturer's instructions. Plates were incubated at 37°C for ~24 hours, then subjected to  
849 fractionation as described above.

#### 850 **siRNA Transfection**

851 Silencer Select siRNAs were obtained from ThermoFisher targeting YTHDC1 (n372360,  
852 n372361, n372362) or Negative Controls (4390843, 4390846) and transfected into 293 cell lines using  
853 Lipofectamine RNAiMAX Transfection Reagent (13778030, ThermoFisher). Transfections were  
854 performed in a 24-well plate with 5 pmol of siRNA and 1.5 µl RNAiMAX Transfection reagent per well.  
855 Cells were harvested 24 hours after transfections and analyzed by Luciferase Assay and qRT-PCR.

#### 856 **Luciferase Assay**

857 Analysis of luciferase activity was performed using the Luciferase Assay System (E1500,  
858 Promega). Cells were washed with 1x PBS and lysed in 100  $\mu$ l 1x Cell Culture Lysis Reagent. Cells were  
859 scraped from bottom of dish and suspension was transferred to a new tube. Lysates were frozen and  
860 thawed prior to luciferase assay to ensure complete lysis. Luciferase assays were performed on 20  $\mu$ l of  
861 lysate or 1x Cell Culture Lysis Reagent in 96 well plates on the GloMax-Multi Detection System (TM297,  
862 Promega). 100  $\mu$ l Luciferase Assay Reagent was added to wells, mixed, and light production measured.  
863 Measurements were performed in 3 technical replicates for each biological replicate. Luciferase activity  
864 was normalized to protein concentration of samples.

### 865 **Statistical Analyses**

866 Graphs were prepared and data fitting and statistical analyses were performed using Biovinci©  
867 (version 1.1.5, Bioturing, Inc., San Diego, California, USA). Each box-and-whisker plot displays  
868 datapoints for each replicate, the median value as a line, a box around the lower and upper quartiles,  
869 and whiskers extending to maximum and minimum values, excluding outliers as determined by the upper  
870 and lower fences. A student's unpaired T-test was used to determine statistical significance. Differences  
871 and relationships were considered statistically significant when  $p \leq 0.05$ . For all graphs, \*  $p < 0.05$ , \*\*  $p <$   
872  $0.01$ , \*\*\*  $p < 0.001$ , \*\*\*\*  $p < 0.0001$ .

873

874

### 875 **Acknowledgements**

876 This work was funded by the NIH (R35GM119575 (AMJ), R01CA187733 (JKR), T32CA190216 (AMP),  
877 T32GM008730 (JTR), F31CA247343 (JTR), F32CA239436 (MMW), and NCI Cancer Center Support  
878 Grant P30CA046934 to the University of Colorado Cancer Center), a Department of Defense Breast  
879 Cancer Research Program Fellowship Award BC170270 (AMP), and an RNA Bioscience Initiative Grant.  
880 We thank Maggie M. Balas for figure advice and preparation, Rafael Margueron for providing cell lines

881 used in this study, Chuan He for providing METTL3 and METTL14 expression plasmids, and John Rinn,  
882 Suja Jagannathan, Neelanjan Mukherjee, and Maria Aristizabal for their suggestions on the manuscript.

883

#### 884 **Author Contributions**

885 AMP, JTR, JKR, and AMJ designed research; AMP, JTR, MC, EDD, AL, MK performed experiments;  
886 AMP, JTR, and MMW analyzed data; and AMP, JKR, and AMJ wrote the paper.

887

#### 888 **Competing Interests**

889 The authors declare that they have no competing interests.

890

891

892

#### 893 **References**

- 894 Alarcon, C. R., Goodarzi, H., Lee, H., Liu, X., Tavazoie, S., & Tavazoie, S. F. (2015). HNRNPA2B1 Is a  
895 Mediator of m(6)A-Dependent Nuclear RNA Processing Events. *Cell*, 162(6), 1299–1308.  
896 <https://doi.org/10.1016/j.cell.2015.08.011>
- 897 Arshi A, Raeisi F, Mahmoudi E, Mohajerani F, Kabiri H, Fazel R, Zabihian-Langeroudi M, J. A. (2020).  
898 A comparative study of HOTAIR expression in breast cancer patient tissues and cell lines. *Cell J*,  
899 22(2), 178–184. <https://doi.org/10.22074/cellj.2020.6543>
- 900 Ashburner, M., Ball, C. A., Blake, J. A., Botstein, D., Butler, H., Cherry, J. M., ... Sherlock, G. (2000).  
901 Gene ontology: tool for the unification of biology. The Gene Ontology Consortium. *Nature*  
902 *Genetics*, 25(1), 25–29. <https://doi.org/10.1038/75556>
- 903 Balas, M. M., & Johnson, A. M. (2018). Exploring the mechanisms behind long noncoding RNAs and  
904 cancer. *Non-Coding RNA Research*, 3(3), 108–117. <https://doi.org/10.1016/j.ncrna.2018.03.001>
- 905 Chandrashekar, D. S., Bashel, B., Balasubramanya, S. A. H., Creighton, C. J., Ponce-Rodriguez, I.,  
906 Chakravarthi, B. V. S. K., & Varambally, S. (2017). UALCAN: A Portal for Facilitating Tumor  
907 Subgroup Gene Expression and Survival Analyses. *Neoplasia*, 19(8), 649–658.  
908 <https://doi.org/https://doi.org/10.1016/j.neo.2017.05.002>
- 909 Coker, H., Wei, G., & Brockdorff, N. (2019). m6A modification of non-coding RNA and the control of  
910 mammalian gene expression. *Biochimica et Biophysica Acta. Gene Regulatory Mechanisms*,

- 911 1862(3), 310–318. <https://doi.org/10.1016/j.bbagr.2018.12.002>
- 912 Coker, H., Wei, G., Moindrot, B., Mohammed, S., Nesterova, T., & Brockdorff, N. (2020). The role of the  
913 Xist 5' m6A region and RBM15 in X chromosome inactivation. *Wellcome Open Research*, 5, 31.  
914 <https://doi.org/10.12688/wellcomeopenres.15711.1>
- 915 Deng, J., Yang, M., Jiang, R., An, N., Wang, X., & Liu, B. (2017). Long Non-Coding RNA HOTAIR  
916 Regulates the Proliferation, Self-Renewal Capacity, Tumor Formation and Migration of the Cancer  
917 Stem-Like Cell (CSC) Subpopulation Enriched from Breast Cancer Cells. *PLOS ONE*, 12(1),  
918 e0170860. Retrieved from <https://doi.org/10.1371/journal.pone.0170860>
- 919 Esteller, M. (2011). Non-coding RNAs in human disease. *Nature Reviews Genetics*, 12(12), 861–874.  
920 <https://doi.org/10.1038/nrg3074>
- 921 Grozhik, A. V, Linder, B., Olarerin-George, A. O., & Jaffrey, S. R. (2017). Mapping m(6)A at Individual-  
922 Nucleotide Resolution Using Crosslinking and Immunoprecipitation (miCLIP). *Methods in*  
923 *Molecular Biology (Clifton, N.J.)*, 1562, 55–78. [https://doi.org/10.1007/978-1-4939-6807-7\\_5](https://doi.org/10.1007/978-1-4939-6807-7_5)
- 924 Gupta, R. a, Shah, N., Wang, K. C., Kim, J., Horlings, H. M., Wong, D. J., ... Chang, H. Y. (2010). Long  
925 non-coding RNA HOTAIR reprograms chromatin state to promote cancer metastasis. *Nature*,  
926 464(7291), 1071–1076. <https://doi.org/10.1038/nature08975>
- 927 Györfy, B., Lanczky, A., Eklund, A. C., Denkert, C., Budczies, J., Li, Q., & Szallasi, Z. (2010). An online  
928 survival analysis tool to rapidly assess the effect of 22,277 genes on breast cancer prognosis  
929 using microarray data of 1,809 patients. *Breast Cancer Research and Treatment*, 123(3), 725–  
930 731. <https://doi.org/10.1007/s10549-009-0674-9>
- 931 Hajjari, M., & Salavaty, A. (2015). HOTAIR: an oncogenic long non-coding RNA in different cancers.  
932 *Cancer Biology & Medicine*, 12(1), 1–9. <https://doi.org/10.7497/j.issn.2095-3941.2015.0006>
- 933 Han, Y., Feng, J., Xia, L., Dong, X., Zhang, X., Zhang, S., ... He, C. (2019). CVm6A: A Visualization  
934 and Exploration Database for m(6)As in Cell Lines. *Cells*, 8(2).  
935 <https://doi.org/10.3390/cells8020168>
- 936 Hulsen, T., de Vlieg, J., & Alkema, W. (2008). BioVenn – a web application for the comparison and  
937 visualization of biological lists using area-proportional Venn diagrams. *BMC Genomics*, 9(1), 488.  
938 <https://doi.org/10.1186/1471-2164-9-488>
- 939 Jarroux, J., Foretek, D., Bertrand, C., Gabriel, M., Szachnowski, U., Saci, Z., ... Morillon, A. (2021).  
940 HOTAIR lncRNA promotes epithelial–mesenchymal transition by redistributing LSD1 at regulatory  
941 chromatin regions. *EMBO Reports*, n/a(n/a), e50193.  
942 <https://doi.org/https://doi.org/10.15252/embr.202050193>
- 943 Ko, P., Lenka, G., Chen, Y., Chuang Y., E., Tsai, M., Sher, Y., & Lai, L. (2020). Semaphorin 5A  
944 suppresses the proliferation and migration of lung adenocarcinoma cells. *Int J Oncol*, 56(1), 165–  
945 177. <https://doi.org/10.3892/ijo.2019.4932>
- 946 Konermann, S., Lotfy, P., Brideau, N. J., Oki, J., Shokhirev, M. N., & Hsu, P. D. (2018). Transcriptome  
947 Engineering with RNA-Targeting Type VI-D CRISPR Effectors. *Cell*, 173(3), 665-676.e14.  
948 <https://doi.org/10.1016/j.cell.2018.02.033>
- 949 Li, L., Liu, B., Wapinski, O. L., Tsai, M. C., Qu, K., Zhang, J., ... Chang, H. Y. (2013). Targeted

- 950 Disruption of Hotair Leads to Homeotic Transformation and Gene Derepression. *Cell Reports*,  
951 5(1), 3–12. <https://doi.org/10.1016/j.celrep.2013.09.003>
- 952 Li, Y., Xia, L., Tan, K., Ye, X., Zuo, Z., Li, M., ... Xia, L. (2020). N(6)-Methyladenosine co-  
953 transcriptionally directs the demethylation of histone H3K9me2. *Nature Genetics*, 52(9), 870–877.  
954 <https://doi.org/10.1038/s41588-020-0677-3>
- 955 Liu, Jianzhao, Yue, Y., Han, D., Wang, X., Fu, Y., Zhang, L., ... He, C. (2014). A METTL3-METTL14  
956 complex mediates mammalian nuclear RNA N6-adenosine methylation. *Nature Chemical Biology*,  
957 10(2), 93–95. <https://doi.org/10.1038/nchembio.1432>
- 958 Liu, Jun, Dou, X., Chen, C., Chen, C., Liu, C., Xu, M. M., ... He, C. (2020). N6-methyladenosine of  
959 chromosome-associated regulatory RNA regulates chromatin state and transcription. *Science*,  
960 367(6477), 580 LP – 586. <https://doi.org/10.1126/science.aay6018>
- 961 Long, Y., Wang, X., Youmans, D. T., & Cech, T. R. (2017). How do lncRNAs regulate transcription?  
962 *Science Advances*, 3(9), eaao2110. <https://doi.org/10.1126/sciadv.aao2110>
- 963 Love, M. I., Huber, W., & Anders, S. (2014). Moderated estimation of fold change and dispersion for  
964 RNA-seq data with DESeq2. *Genome Biology*, 15(12), 550. <https://doi.org/10.1186/s13059-014-0550-8>
- 965
- 966 McDonald, O. G., Wu, H., Timp, W., Doi, A., & Feinberg, A. P. (2011). Genome-scale epigenetic  
967 reprogramming during epithelial-to-mesenchymal transition. *Nature Structural & Molecular Biology*,  
968 18(8), 867–874. <https://doi.org/10.1038/nsmb.2084>
- 969 Meredith, E. K., Balas, M. M., Sindy, K., Haislop, K., & Johnson, A. M. (2016). An RNA matchmaker  
970 protein regulates the activity of the long noncoding RNA HOTAIR. *RNA (New York, N. Y.)*, 1–16.  
971 <https://doi.org/10.1261/rna.055830.115>
- 972 Meyer, K. D., Saletore, Y., Zumbo, P., Elemento, O., Mason, C. E., & Jaffrey, S. R. (2012).  
973 Comprehensive analysis of mRNA methylation reveals enrichment in 3' UTRs and near stop  
974 codons. *Cell*, 149(7), 1635–1646. <https://doi.org/10.1016/j.cell.2012.05.003>
- 975 Mi, H., Muruganujan, A., Ebert, D., Huang, X., & Thomas, P. D. (2019). PANTHER version 14: more  
976 genomes, a new PANTHER GO-slim and improvements in enrichment analysis tools. *Nucleic  
977 Acids Research*, 47(D1), D419–D426. <https://doi.org/10.1093/nar/gky1038>
- 978 Nesterova, T. B., Wei, G., Coker, H., Pintacuda, G., Bowness, J. S., Zhang, T., ... Brockdorff, N.  
979 (2019). Systematic allelic analysis defines the interplay of key pathways in X chromosome  
980 inactivation. *Nature Communications*, 10(1), 3129. <https://doi.org/10.1038/s41467-019-11171-3>
- 981 Nguyen, E. D., Balas, M. M., Griffin, A. M., Roberts, J. T., & Johnson, A. M. (2018). Global profiling of  
982 hnRNP A2/B1-RNA binding on chromatin highlights lncRNA interactions. *RNA Biology*, 15(7),  
983 901–913. <https://doi.org/10.1080/15476286.2018.1474072>
- 984 Niu, Y., Lin, Z., Wan, A., Chen, H., Liang, H., Sun, L., ... Wan, G. (2019). RNA N6-methyladenosine  
985 demethylase FTO promotes breast tumor progression through inhibiting BNIP3. *Molecular Cancer*,  
986 18(1), 46. <https://doi.org/10.1186/s12943-019-1004-4>
- 987 Patil, D. P., Chen, C.-K., Pickering, B. F., Chow, A., Jackson, C., Guttman, M., & Jaffrey, S. R. (2016).  
988 m6A RNA methylation promotes XIST-mediated transcriptional repression. *Nature*, 537(7620), 1–

- 989 25. <https://doi.org/10.1038/nature19342>
- 990 Patro, R., Duggal, G., Love, M. I., Irizarry, R. A., & Kingsford, C. (2017). Salmon provides fast and bias-  
991 aware quantification of transcript expression. *Nature Methods*, 14(4), 417–419.  
992 <https://doi.org/10.1038/nmeth.4197>
- 993 Pishvaian, M. J., Feltes, C. M., Thompson, P., Bussemakers, M. J., Schalken, J. A., & Byers, S. W.  
994 (1999). Cadherin-11 is expressed in invasive breast cancer cell lines. *Cancer Research*, 59(4),  
995 947–952.
- 996 Portoso, M., Ragazzini, R., Brencic, Z., Moiani, A., Michaud, A., Vassilev, I., ... Margueron, R. (2017).  
997 PRC2 is dispensable for HOTAIR-mediated transcriptional repression. *The EMBO Journal*.  
998 <https://doi.org/10.15252/embj.201695335>
- 999 Rafalska, I., Zhang, Z., Benderska, N., Wolff, H., Hartmann, A. M., Brack-Werner, R., & Stamm, S.  
1000 (2004). The intranuclear localization and function of YT521-B is regulated by tyrosine  
1001 phosphorylation. *Human Molecular Genetics*, 13(15), 1535–1549.  
1002 <https://doi.org/10.1093/hmg/ddh167>
- 1003 Rezaul, K., Thumar, J. K., Lundgren, D. H., Eng, J. K., Claffey, K. P., Wilson, L., & Han, D. K. (2010).  
1004 Differential protein expression profiles in estrogen receptor-positive and -negative breast cancer  
1005 tissues using label-free quantitative proteomics. *Genes & Cancer*, 1(3), 251–271.  
1006 <https://doi.org/10.1177/1947601910365896>
- 1007 Rinn, J. L., Kertesz, M., Wang, J. K., Squazzo, S. L., Xu, X., Brugmann, S. A., ... Chang, H. Y. (2007).  
1008 Functional Demarcation of Active and Silent Chromatin Domains in Human HOX Loci by  
1009 Noncoding RNAs. *Cell*, 129(7), 1311–1323. <https://doi.org/10.1016/j.cell.2007.05.022>
- 1010 Roberts, J. T., Porman, A. M., & Johnson, A. M. (2020). Identification of m6A residues at single-  
1011 nucleotide resolution using eCLIP and an accessible custom analysis pipeline. *RNA (New York,*  
1012 *N.Y.)*. <https://doi.org/10.1261/rna.078543.120>
- 1013 Roth, V. (2006). Doubling Time Computing. Retrieved from [https://doubling-](https://doubling-time.com/compute_more.php)  
1014 [time.com/compute\\_more.php](https://doubling-time.com/compute_more.php)
- 1015 Roundtree, I. A., Luo, G.-Z., Zhang, Z., Wang, X., Zhou, T., Cui, Y., ... He, C. (2017). YTHDC1  
1016 mediates nuclear export of N(6)-methyladenosine methylated mRNAs. *ELife*, 6.  
1017 <https://doi.org/10.7554/eLife.31311>
- 1018 Schmitt, A. M., & Chang, H. Y. (2016). Long Noncoding RNAs in Cancer Pathways. *Cancer Cell*, 29(4),  
1019 452–463. <https://doi.org/10.1016/j.ccell.2016.03.010>
- 1020 Shi, H., Wei, J., & He, C. (2019). Where, When, and How: Context-Dependent Functions of RNA  
1021 Methylation Writers, Readers, and Erasers. *Molecular Cell*, 74(4), 640–650.  
1022 <https://doi.org/https://doi.org/10.1016/j.molcel.2019.04.025>
- 1023 Somarowthu, S., Legiewicz, M., Chillon, I., Marcia, M., Liu, F., & Pyle, A. M. (2015). HOTAIR forms an  
1024 intricate and modular secondary structure. *Molecular Cell*, 58(2), 353–361.  
1025 <https://doi.org/10.1016/j.molcel.2015.03.006>
- 1026 Takahashi, S. (2018). Molecular functions of SIRPα and its role in cancer. *Biomedical Reports*, 9(1), 3–  
1027 7. <https://doi.org/10.3892/br.2018.1102>

- 1028 Tang, Z., Kang, B., Li, C., Chen, T., & Zhang, Z. (2019). GEPIA2: an enhanced web server for large-  
1029 scale expression profiling and interactive analysis. *Nucleic Acids Research*, *47*(W1), W556–W560.  
1030 <https://doi.org/10.1093/nar/gkz430>
- 1031 The Gene Ontology resource: enriching a GOld mine. (2021). *Nucleic Acids Research*, *49*(D1), D325–  
1032 D334. <https://doi.org/10.1093/nar/gkaa1113>
- 1033 Tsai, M.-C., Manor, O., Wan, Y., Mosammamparast, N., Wang, J. K., Lan, F., ... Chang, H. Y. (2010).  
1034 Long noncoding RNA as modular scaffold of histone modification complexes. *Science (New York,*  
1035 *N. Y.)*, *329*(5992), 689–693. <https://doi.org/10.1126/science.1192002>
- 1036 Van Nostrand, E. L., Pratt, G. A., Shishkin, A. A., Gelboin-Burkhart, C., Fang, M. Y., Sundararaman, B.,  
1037 ... Yeo, G. W. (2016). Robust transcriptome-wide discovery of RNA-binding protein binding sites  
1038 with enhanced CLIP (eCLIP). *Nature Methods*, *13*(6), 508–514.  
1039 <https://doi.org/10.1038/nmeth.3810>
- 1040 Vaquero, A., Scher, M., Lee, D., Erdjument-Bromage, H., Tempst, P., & Reinberg, D. (2004). Human  
1041 SirT1 interacts with histone H1 and promotes formation of facultative heterochromatin. *Molecular*  
1042 *Cell*, *16*(1), 93–105. <https://doi.org/10.1016/j.molcel.2004.08.031>
- 1043 Wang, Y., Zhang, H., Chen, Y., Sun, Y., Yang, F., Yu, W., ... Shang, Y. (2009). LSD1 Is a Subunit of  
1044 the NuRD Complex and Targets the Metastasis Programs in Breast Cancer. *Cell*, *138*(4), 660–  
1045 672. <https://doi.org/https://doi.org/10.1016/j.cell.2009.05.050>
- 1046 Wu, L., Wu, D., Ning, J., Liu, W., & Zhang, D. (2019). Changes of N6-methyladenosine modulators  
1047 promote breast cancer progression. *BMC Cancer*, *19*(1), 326. [https://doi.org/10.1186/s12885-019-](https://doi.org/10.1186/s12885-019-5538-z)  
1048 [5538-z](https://doi.org/10.1186/s12885-019-5538-z)
- 1049 Wu, X., Sang, L., & Gong, Y. (2018). N6-methyladenine RNA modification and cancers. *American*  
1050 *Journal of Cancer Research*, *8*(10), 1957–1966.
- 1051 Wu, Yansheng, Zhang, L., Zhang, L., Wang, Y., Li, H., Ren, X., ... Hao, X. (2015). Long non-coding  
1052 RNA HOTAIR promotes tumor cell invasion and metastasis by recruiting EZH2 and repressing E-  
1053 cadherin in oral squamous cell carcinoma. *International Journal of Oncology*, *46*(6), 2586–2594.  
1054 <https://doi.org/10.3892/ijo.2015.2976>
- 1055 Wu, Yingmin, Yang, X., Chen, Z., Tian, L., Jiang, G., Chen, F., ... Wang, H. (2019). m(6)A-induced  
1056 lncRNA RP11 triggers the dissemination of colorectal cancer cells via upregulation of Zeb1.  
1057 *Molecular Cancer*, *18*(1), 87. <https://doi.org/10.1186/s12943-019-1014-2>
- 1058 Xiao, T., Xu, Z., Zhang, H., Geng, J., Qiao, Y., Liang, Y., ... Suo, G. (2019). TP53I11 suppresses  
1059 epithelial-mesenchymal transition and metastasis of breast cancer cells. *BMB Reports*, *52*(6),  
1060 379–384. <https://doi.org/10.5483/BMBRep.2019.52.6.173>
- 1061 Xu, W., Li, J., He, C., Wen, J., Ma, H., Rong, B., ... Shen, H. (2021). METTL3 regulates  
1062 heterochromatin in mouse embryonic stem cells. *Nature*, *591*(7849), 317–321.  
1063 <https://doi.org/10.1038/s41586-021-03210-1>
- 1064 Yang, Z., Zhou, L., Wu, L.-M., Lai, M.-C., Xie, H.-Y., Zhang, F., & Zheng, S.-S. (2011). Overexpression  
1065 of long non-coding RNA HOTAIR predicts tumor recurrence in hepatocellular carcinoma patients  
1066 following liver transplantation. *Annals of Surgical Oncology*, *18*(5), 1243–1250.



- 1067 <https://doi.org/10.1245/s10434-011-1581-y>
- 1068 Zaccara, S., Ries, R. J., & Jaffrey, S. R. (2019). Reading, writing and erasing mRNA methylation.  
1069 *Nature Reviews Molecular Cell Biology*, 20(10), 608–624. [https://doi.org/10.1038/s41580-019-](https://doi.org/10.1038/s41580-019-0168-5)  
1070 0168-5
- 1071 Zhang, C., Zhi, W. I., Lu, H., Samanta, D., Chen, I., Gabrielson, E., & Semenza, G. L. (2016). Hypoxia-  
1072 inducible factors regulate pluripotency factor expression by ZNF217- and ALKBH5-mediated  
1073 modulation of RNA methylation in breast cancer cells. *Oncotarget*, 7(40), 64527–64542.  
1074 <https://doi.org/10.18632/oncotarget.11743>
- 1075 Zhang, J. X., Han, L., Bao, Z. S., Wang, Y. Y., Chen, L. Y., Yan, W., ... Kang, C. S. (2013). HOTAIR, a  
1076 cell cycle-associated long noncoding RNA and a strong predictor of survival, is preferentially  
1077 expressed in classical and mesenchymal glioma. *Neuro-Oncology*, 15(12), 1595–1603.  
1078 <https://doi.org/10.1093/neuonc/not131>
- 1079
- 1080

1081

**Figures and Figure Legends**

**Figure 1**

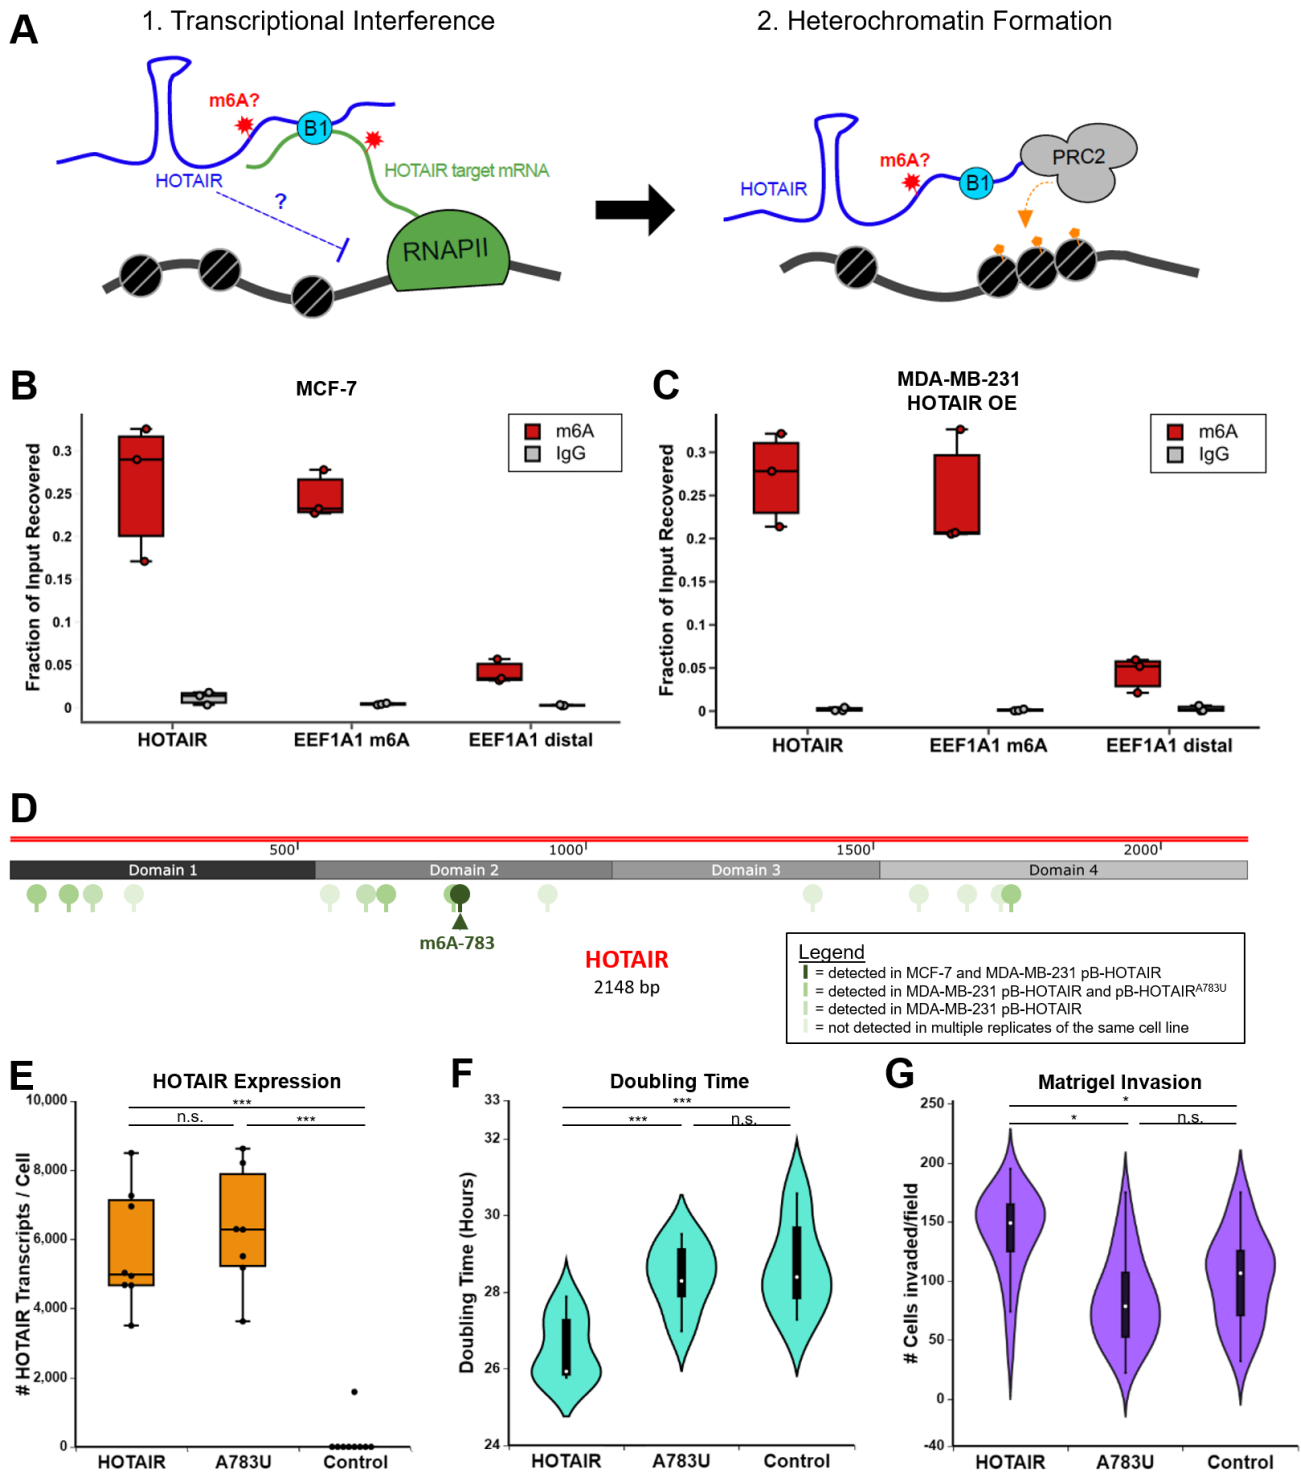

1082

1083 **Figure 1. LncRNA HOTAIR is m6A modified. A)** General model for HOTAIR mechanism. HOTAIR is  
1084 initially recruited to its target loci via RNA-RNA interactions with its mRNA targets which is mediated by  
1085 hnRNP B1. HOTAIR association with chromatin induces transcriptional interference via an unknown  
1086 mechanism, promoting heterochromatin formation by PRC2 through H3K27me3. This paper investigates  
1087 the role of m6A on HOTAIR. **B-C)** m6A RNA immunoprecipitation performed with an m6A antibody or  
1088 IgG control in MCF-7 breast cancer cells (C) or MDA-MB-231 breast cancer cells with transgenic  
1089 overexpression of HOTAIR (D). An m6A modified region in EEF1A1 (EEF1A1 m6A) is a positive control,  
1090 while a distal region in EEF1A1 that is not m6A modified (EEF1A1 distal) serves as a negative control.  
1091 **D)** m6A sites detected in HOTAIR-expressing cells in 6 experiments (yellow to red scale of increasing  
1092 occurrences). m6A site 783 (dark red, arrow) was detected in every experiment except where it was  
1093 mutated. **E)** Number of HOTAIR transcripts in MDA-MB-231 cells overexpressing WT HOTAIR, A783U  
1094 HOTAIR, or an Anti-Luciferase control RNA. **F)** Doubling time of MDA-MB-231 overexpression cell lines  
1095 described in (A). **G)** Quantification of cell invasion assays.

Figure 2

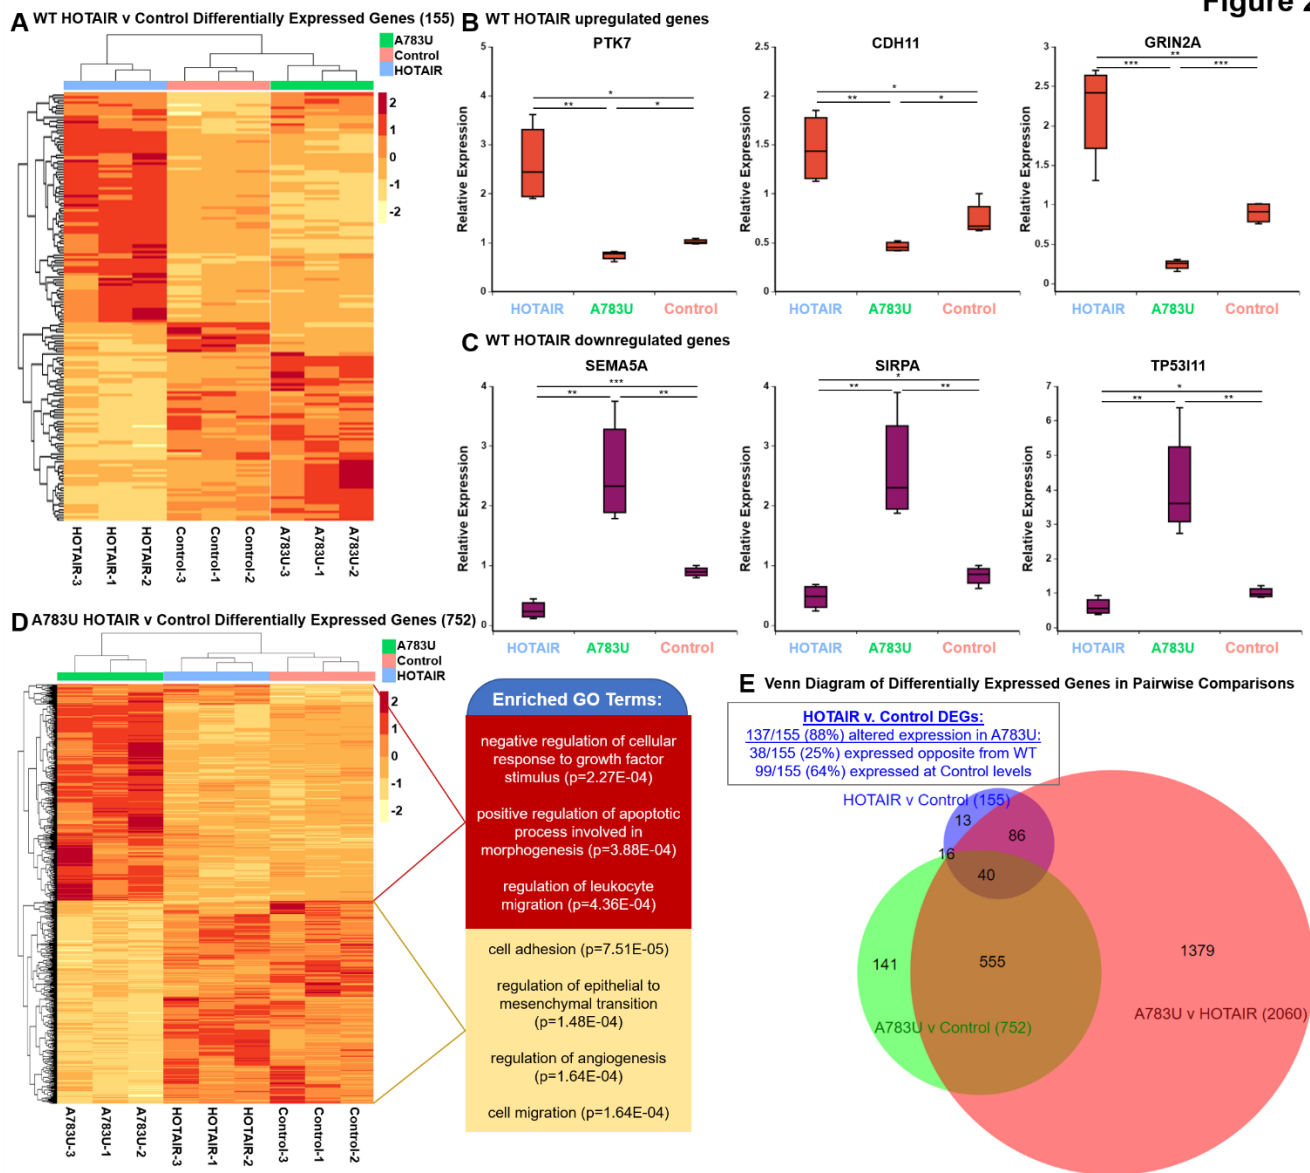

1096 **Figure 2. HOTAIR-mediated gene expression changes in breast cancer are altered by mutation of**  
 1097 **A783.** **A)** Heatmap of Z-scores of differentially expressed genes (DEGs) between MDA-MB-231 cells  
 1098 overexpressing wild-type HOTAIR versus an Anti-Luciferase control. **B-C)** qRT-PCR analysis of genes  
 1099 upregulated (B) or downregulated (C) upon HOTAIR overexpression. **D)** Heatmap of Z-scores of DEGs  
 1100 between MDA-MB-231 cells overexpressing A783U mutant HOTAIR versus an Anti-Luciferase control,  
 1101 left. Selected significant GO terms in upregulated (red) and downregulated (yellow) genes, right. **E)** Venn  
 1102 diagram (created using BioVenn, (Hulsen, de Vlieg, & Alkema, 2008)) of number of DEGs between MDA-  
 1103 MB-231 cells overexpressing wild-type HOTAIR, A783U mutant HOTAIR, or an Anti-Luciferase control.

1104 Inset describes the direction of change in the A783U v. Control relative to the direction of the wild-type  
 1105 HOTAIR v. Control, based on adjusted  $p < 0.1$ .

1106

**Figure 3**

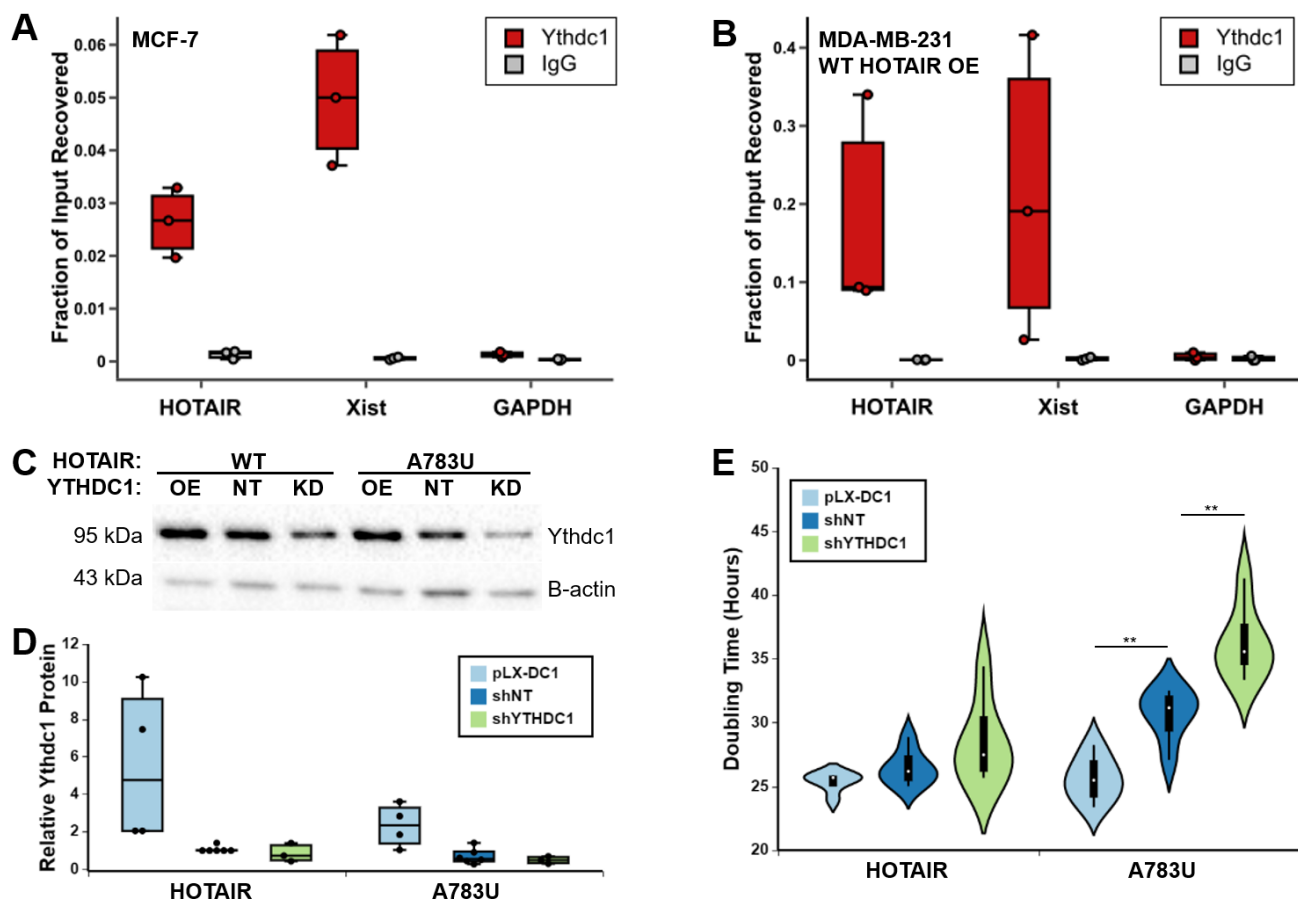

1107

1108 **Figure 3. YTHDC1 interacts with HOTAIR and enables HOTAIR-mediated breast cancer growth. A-**  
 1109 **B)** YTHDC1 RIP performed in MCF-7 cells (A) or MDA-MB-231 cells overexpressing transgenic HOTAIR  
 1110 (B). **C)** Western blot results of YTHDC1 protein levels in pLX-DC1 overexpression, shNT control, and  
 1111 shDC1 knockdown MDA-MB-231 cell lines expressing WT or A783U HOTAIR. **D)** Quantification of 3  
 1112 replicates of (C). Protein levels of YTHDC1 were normalized to  $\beta$ -actin levels and are relative to the  
 1113 HOTAIR shNT sample. **E)** Doubling time of MDA-MB-231 cells containing WT or A783U HOTAIR and  
 1114 overexpression or knockdown of YTHDC1.

**Figure 4**

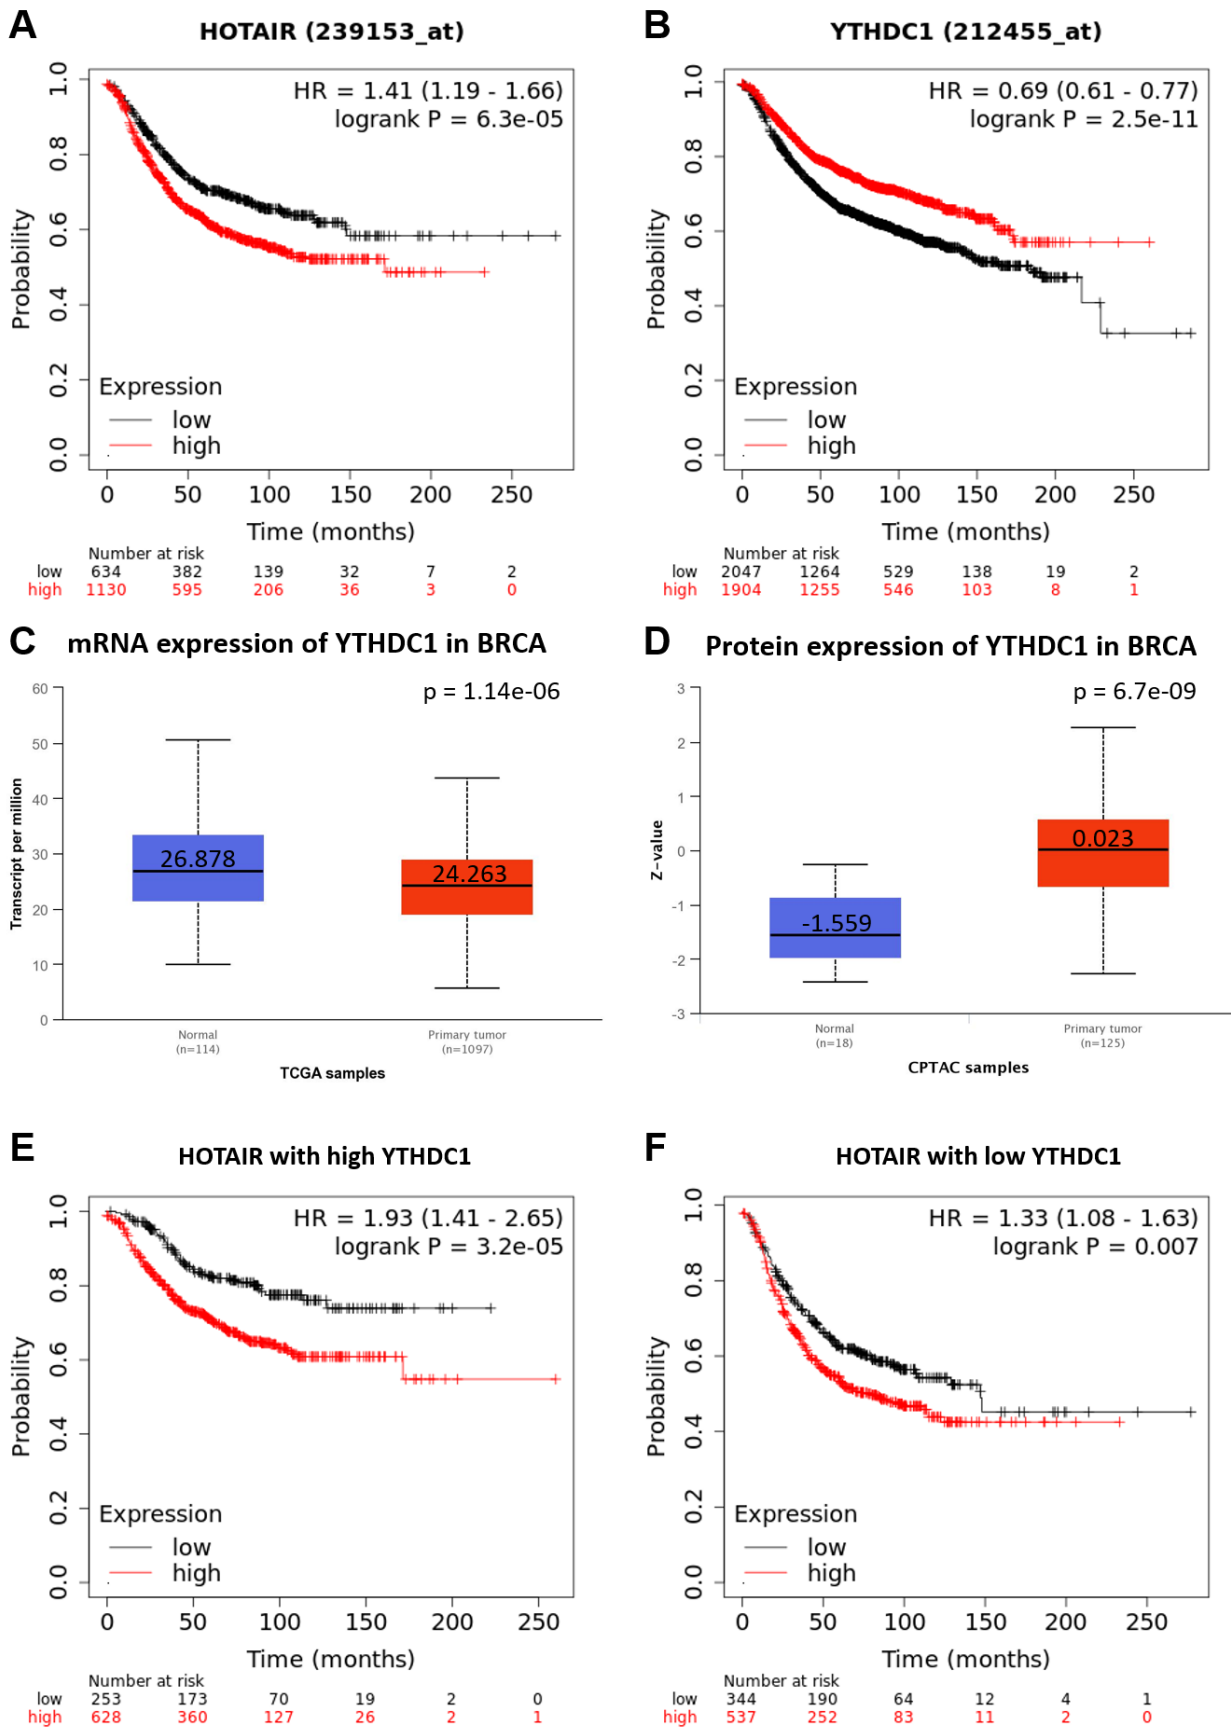

1116 **Figure 4. *YTHDC1* and *HOTAIR* in breast cancer outcomes. A-B)** Kaplan-Meier curves for recurrence-  
1117 free survival of breast cancer patients with high or low expression of A) *YTHDC1* or B) *HOTAIR* generated  
1118 using Kaplan-Meier Plotter(Gyorffy et al., 2010). **C-D)** Expression of *YTHDC1* C) mRNA and D) protein  
1119 in normal breast tissue versus breast cancers generated with UALCAN(Chandrashekar et al., 2017). **E-**  
1120 **F)** Recurrence-free survival curves for breast cancer patients examining effect of *HOTAIR* on the  
1121 background of either E) high or F) low *YTHDC1* levels, generated with Kaplan-Meier Plotter(Gyorffy et  
1122 al., 2010).

## Figure 5

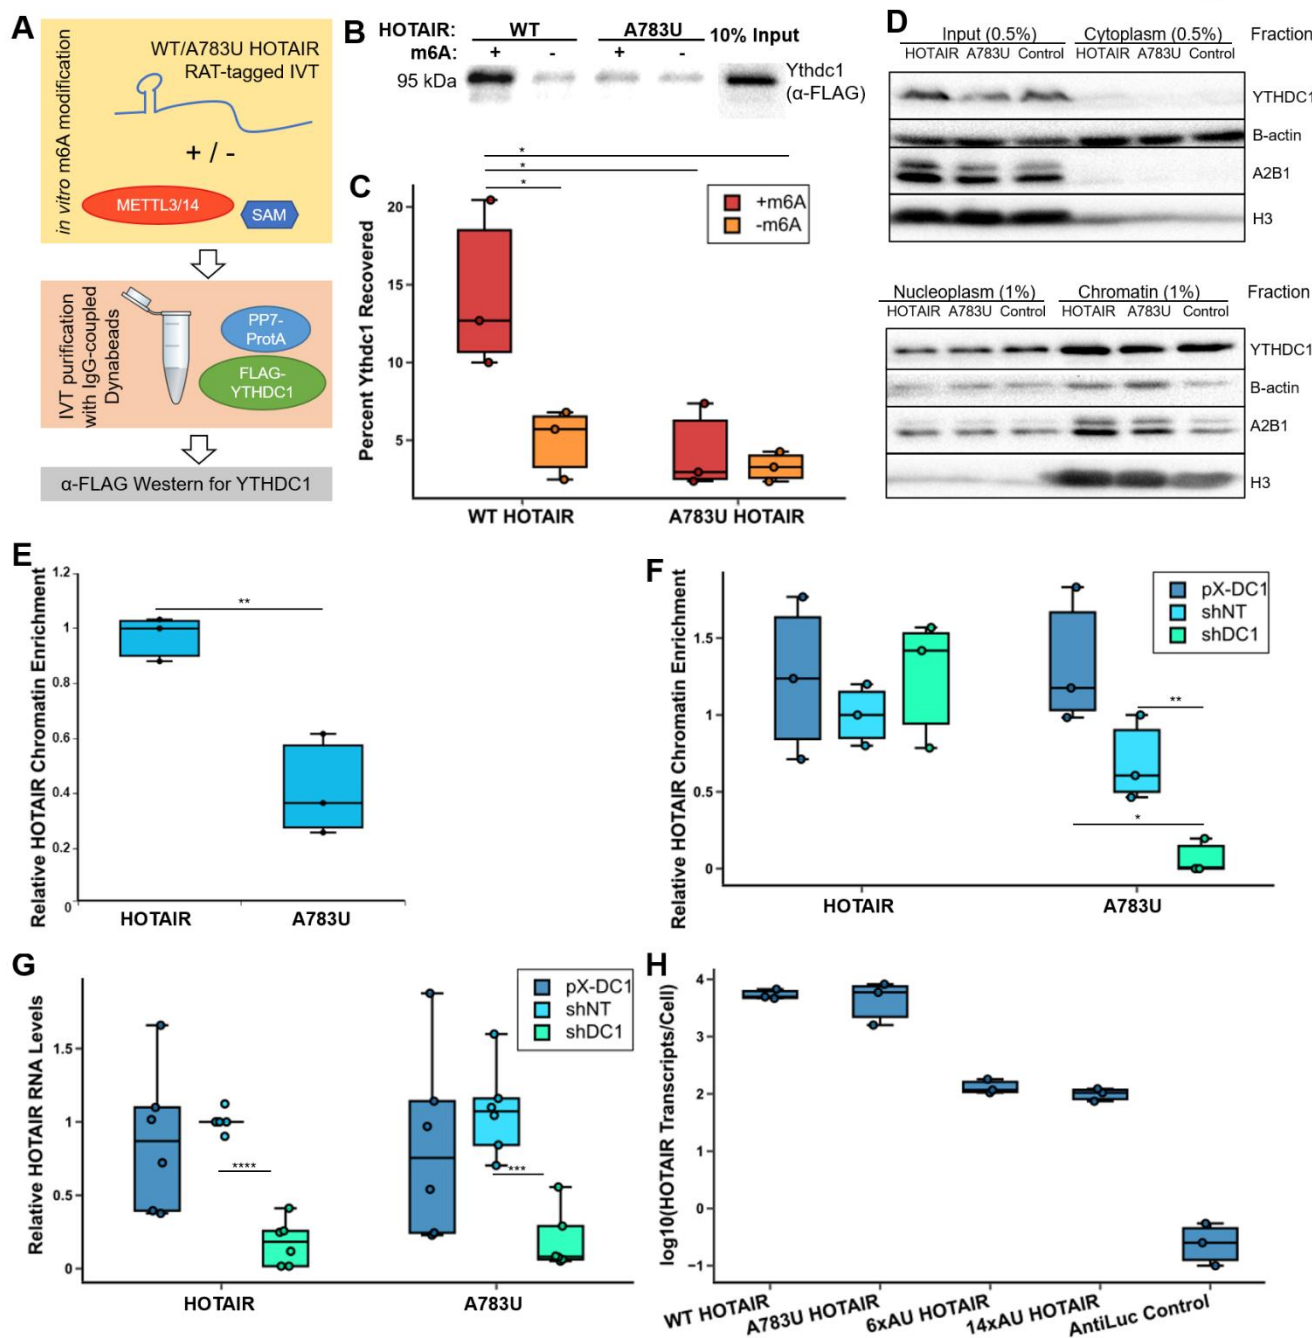

1123

1124 **Figure 5. HOTAIR m6A site 783 mediates interaction with YTHDC1 and chromatin association. A)**

1125 Schematic of YTHDC1 pulldown experiment with m6A-modified WT and A783U HOTAIR. PP7-tagged

1126 domain 2 of WT or A783U HOTAIR was *in vitro* transcribed and m6A modified with purified METTL3/14.

1127 RNA was bound to PP7-Protein A, cellular extract containing FLAG-tagged YTHDC1 was added, and a

1128 pulldown was performed with IgG-coupled Dynabeads. Amount of FLAG-YTHDC1 bound was assessed



1129 by Western blot. **B)** Anti-FLAG Western blot of pulldown experiment outlined in (A). **C)** Quantification of  
1130 anti-FLAG Western blots from 3 replicates. **D)** Western blot performed on fractionation of MDA-MB-231  
1131 cell lines overexpressing WT or A783U HOTAIR or Antisense-Luciferase. **E)** qRT-PCR was performed  
1132 on fractionated RNA samples from MDA-MB-231 cells containing overexpression of WT or A783U  
1133 HOTAIR, and chromatin association was calculated by determining the relative chromatin-associated  
1134 RNA to input and normalizing to 7SL levels and relative to WT HOTAIR samples. **F)** Chromatin  
1135 enrichment was calculated similarly as in (D) in MDA-MB-231 cell lines expressing WT or A783U HOTAIR  
1136 with knockdown or overexpression of YTHDC1. Values are relative to HOTAIR shNT samples. **G)** qRT-  
1137 PCR of *HOTAIR* RNA levels in MDA-MB-231 cell lines overexpressing WT or A783U HOTAIR containing  
1138 overexpression or knockdown of YTHDC1. **H)** qRT-PCR of *HOTAIR* RNA levels in MDA-MB-231 cell  
1139 lines expressing WT, A783U, 6xAU, or 14xAU HOTAIR or an AntiLuc control.

1140

## Figure 6

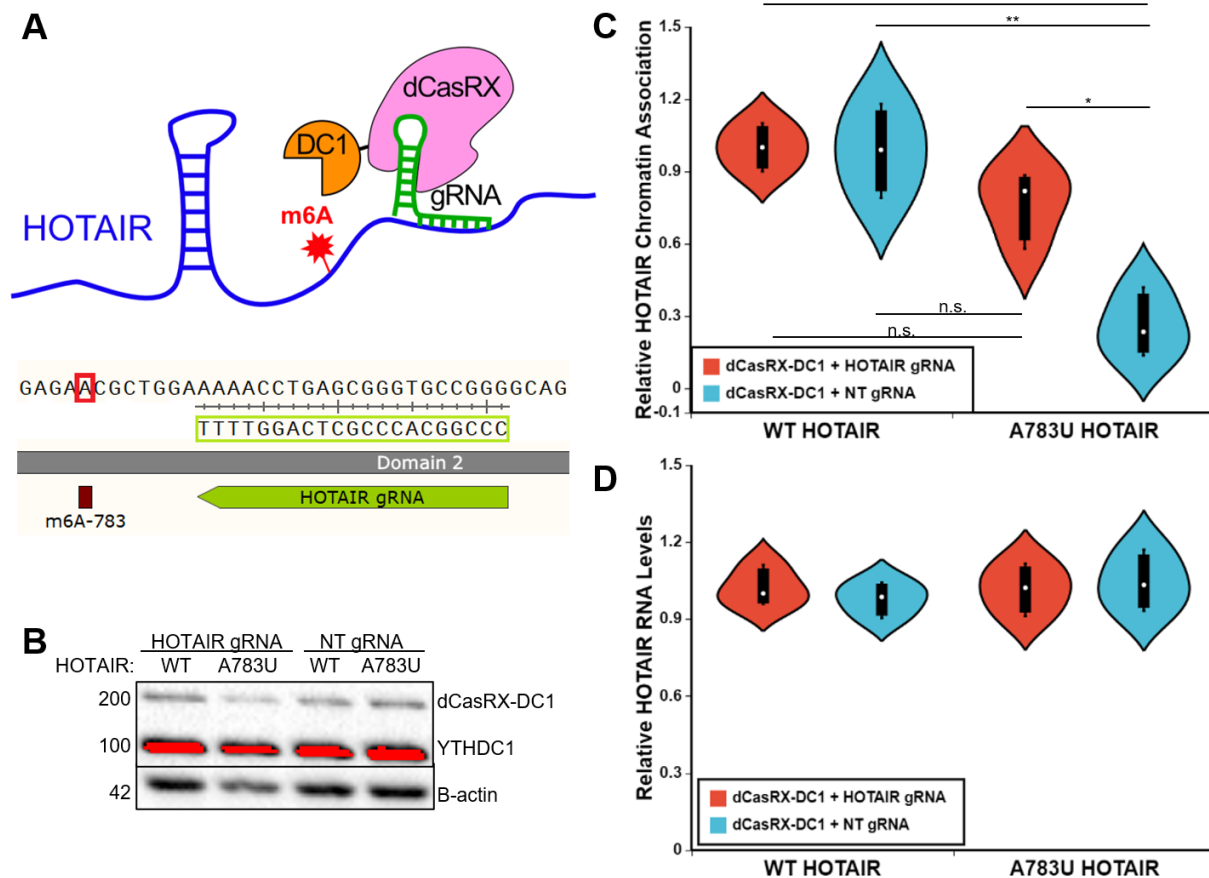

1141

1142 **Figure 6. Tethering YTHDC1 to A783U mutant HOTAIR restores chromatin localization**  
 1143 **independent of changes in RNA levels. A)** Schematic of tethering strategy using a dCasRX-YTHDC1  
 1144 fusion protein and a guide RNA targeted just downstream of A783 in HOTAIR. **B)** Examples of Western  
 1145 blots for YTHDC1 (upper) and B-actin (lower) on input, cytoplasmic, nucleoplasmic, and chromatin  
 1146 samples, as noted. **C)** Similar analysis described in Figure 5D-E was performed on fractionated RNA  
 1147 samples from cell lines overexpressing WT or A783U HOTAIR transfected with a plasmid containing  
 1148 dCasRX-YTHDC1 in combination with a HOTAIR or non-targeting (NT) gRNA, as noted. **D)** Relative  
 1149 HOTAIR RNA levels in Input samples from C.

Figure 7

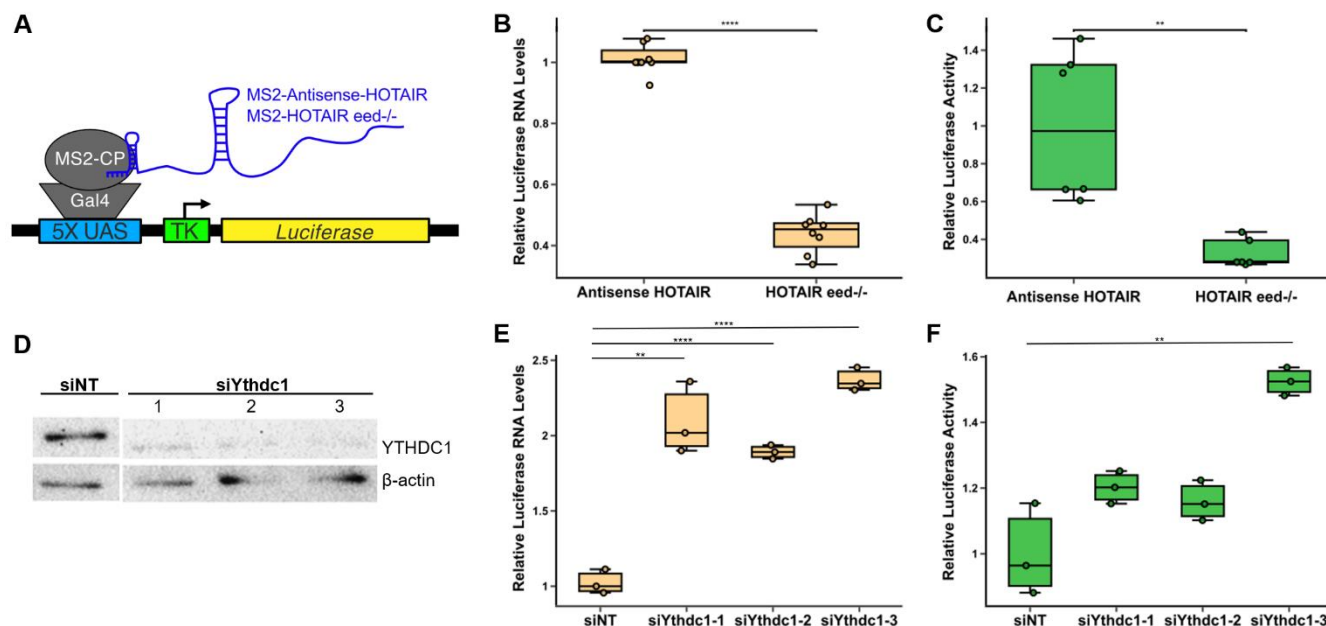

1150

1151 **Figure 7. YTHDC1 mediates transcriptional repression by HOTAIR.** A) Schematic of 293T cells  
 1152 containing MS2-Antisense-HOTAIR or MS2-HOTAIR tethered upstream of a luciferase reporter. MS2-  
 1153 HOTAIR tethered cells also contain a deletion of *EED*, a subunit of PRC2 that is critical for H3K27  
 1154 methylation. B-C) Relative luciferase RNA levels (B) and relative luciferase activity (C) in MS2-Antisense  
 1155 HOTAIR or MS2-HOTAIR *eed*<sup>-/-</sup> cell lines. D) Western blot of YTHDC1 in MS3-HOTAIR *eed*<sup>-/-</sup> 293T  
 1156 reporter cells transfected with non-targeting siRNA or 3 different siRNAs targeting YTHDC1. E-F) Relative  
 1157 luciferase RNA levels (E) and relative luciferase activity (F) of HOTAIR-tethered *eed*<sup>-/-</sup> cells transfected  
 1158 with a non-targeting siRNA or 3 different siRNAs against YTHDC1.

## Figure 8

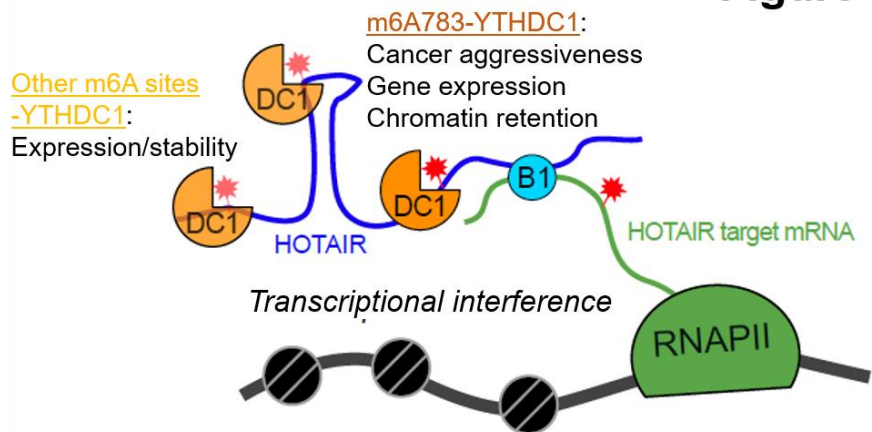

1159

1160 **Figure 8. Model of m6A and YTHDC1 effects on HOTAIR.** The main function of YTHDC1 occurs via  
1161 interaction with m6A783 in HOTAIR and mediates chromatin association of HOTAIR to induce  
1162 transcriptional interference of its target genes, promoting breast cancer growth. YTHDC1 also interacts  
1163 with other m6A sites within HOTAIR and may mediate its high expression levels and/or stability.

1164 **Supplemental File 1. Figure supplements.**

1165 **Supplemental File 2. Supplemental tables of m6A sites identified in HOTAIR and ORFs, shRNAs,**  
1166 **plasmids, and oligonucleotides used in this study.**

1167 **Supplemental File 3. Excel file of differentially expressed genes identified in DESeq2 pairwise**  
1168 **comparisons.**
